# Supplementary material for: Site Characterization vis-à-vis Probabilistic Seismic Hazard and Disaster Potential Modelling in the Himalayan and Sub-Himalayan Tectonic Ensemble from Kashmir Himalaya to Northeast India at the backdrop of the updated Seismic Hazard of the Indian Subcontinent
Source: Copernicus journal article supplement (doi:10.5194/nhess-2022-66), 2022-03-22
Supplement: Supplementary file [file nhess-2022-66-AC1-supplement.pdf]

Response to Reviewers' comments, observations, and actions taken thereof while revising the Manuscript ID: nness-2022-66 Titled "**Site Characterization vis-à-vis Probabilistic Seismic Hazard and Disaster Potential Modelling in the Himalayan and Sub-Himalayan Tectonic Ensemble from Kashmir Himalaya to Northeast India at the backdrop of the updated Seismic Hazard of the Indian Subcontinent**" by Nath et al.

**Response to the comments and observations of Anonymous Reviewer#1**

**Reviewer#1 Overall observation:** The authors present several case studies on site characterization and PSHA of Indian cities. The paper is within the scope of the journal; however, the scientific quantity should be greatly improved in order to consider for publication. Considering the merits of the papers, I encourage the authors to consider the following comments to improve the manuscript.

**Authors' Response:** We feel encouraged by the words of appreciation of the Reviewer. We hereby provide point-by-point response to all the comments and suggestions made by the Reviewer and lay down the proposed actions to be taken thereof while revising the earlier version of the manuscript once asked to do by the Editorial board.

**Reviewer#1:** Abstract should be rewritten since the entire paragraph is superfluous.

**Authors' Response:** We tried to put up a marginally revised abstract (199 words) based on the suggestions made by the Reviewer, which now reads as follows:

"The Socio-economic Risk Map of India generated by integrating Population Density, Building Density, and Landuse/Landcover with IBC-compliant Probabilistic Surface PGA through Analytic Hierarchy Process places the entire tectonic stretch from Kashmir Himalaya to Northeast India together with Bhutan, Northwest India, Nepal, Indo-Gangetic Foredeep, Bengal Basin and Darjeeling-Sikkim Himalaya, in 'High' to 'Severe' Risk regime thus bringing in the essence of site-specific study in this ensemble. Hybrid surface and downhole Geophysical and Geotechnical measurements provided effective Shear wave velocity of soil/alluvium column ( $V_s^{30}$ ) which classifies the Ensemble into 11 site classes viz. F/E, D4, D3, D2, D1, C4, C3, C2, C1, B and A with respective spectral site amplification of 6.2, 4.8, 4.2, 3.9, 3.3, 2.58, 2.2, 1.87, 1.81, 1.4 and 1.2 respectively at 0.73-8.5 Hz frequency range thus facilitating surface-consistent PGA varying between 0.06-1.99g that correlates well with those reported by others. The reported damage scenario on URM and RC buildings triggered by large historical earthquakes in each of the tectonic assemblages are seen to fit well within the, 'slight', 'moderate', 'extensive' and 'complete' damage states as assessed using capacity spectrum method on the prevalent building types for the surface-consistent probabilistic PGA through SELENA-based building damage modelling."

Further suggestions are welcome.

**Reviewer#1:** Please use modest language instead of overly romanticized phrases such as 'huge threats,' 'jolted time and again,' 'wreaked havoc', and many more.

**Authors' Response:** Very good suggestion. Appropriate technical and simple languages will replace the existing ones in the revised manuscript.

**Reviewer#1:** I think Indo-Eurasian subduction region is seismically highly active than peninsular India. Please check.

**Authors' Response:** Very true. **Figure 3** depicting the main shock distribution from the earthquake catalogue used in this study exhibits that major seismic events are concentrated along the Indo-Eurasian subduction region; on the contrary, the seismicity in the Peninsular India region is scanty. Also from the smoothed gridded seismicity models for the polygonal seismogenic sources of India and its surrounding region for the threshold magnitudes of  $M_w$  3.5, 4.5 and 5.5 at the four hypocentral depth ranges used in the present study and shown in **Figure S1** in the electronic supplement exhibit higher seismic activity rate in the Himalayan belt as compared to that in the Peninsular shield region. The updated Probabilistic Seismic Hazard map of the Indian subcontinent at firm rock site condition for 10% probability of exceedance in 50years shown in **Figure 7(a)** also exhibits a higher hazard level to the tune of 0.45-0.95g in terms of Peak Ground Acceleration (PGA) distribution in the Himalaya and the Sub-Himalayan regions whereas the same in the Peninsular India shows a variation of 0.05-0.45g only.

**Reviewer#1:** Please check manuscript language thoroughly and write sentences in objective way, instead of long and curvaceous sentences.

**Authors' Response:** Noted. This will be taken care of while revising the manuscript once advised by the Editorial Board. A glimpse of which is given below.

“The collision between the Indian and the Eurasian plates caused huge tension in the crust, which is relieved occasionally by earthquakes along the plate boundary as well as intraplate faults and lineaments. The Vulnerability Atlas of India (BMTPC, 2019) mentions that more than 59% of the country's total land-cover is vulnerable to seismic threat. Unplanned urbanizations are fast emerging across the country to accommodate the burgeoning population..... Nath et al. (2017) developed a homogeneous  $M_w$  based declustered earthquake catalogue of Southeast Asia and the surrounding region considering earthquake recordings spanning over the period of 1900-2014. The uniform magnitude scaling in moment magnitude  $M_w$  in this catalogue is accomplished through correlating various magnitude types and then declustering the mainshocks from foreshocks and aftershocks and the mainshocks only retained as shown in **Figure 3** that depicts 64,153 mainshock events in the region, which has further been extended to the year 2018 for Seismic Hazard, Vulnerability and Risk Assessment of the region as performed here. ....”

**Reviewer#1:** Line no. 39 requires a reference.

**Authors' Response:** As per the above suggestion, line no. 39 in the earlier version of the manuscript will be modified as follows and will be incorporated in the revised manuscript.

“The fatality counts in urban settlements due to future great Himalayan earthquakes have been envisaged to be around 150-200 thousand (Wyss, 2005; Bilham et al., 2001).”

**Reviewer#1:** The paper is excessively long and lacks justification for such a long discussion. I request the authors to focus straight on the objectives and related works.

**Authors' Response:** The observation has been noted and the text will be modified in the revised manuscript.

**Reviewer#1:** Authors note that they would like to use the results for India, Nepal, and Bhutan; however, they do miss some major contributions related to earthquake hazard and vulnerability especially from Nepal and Bhutan. Some references are:

<https://www.sciencedirect.com/science/article/pii/S1631071317300718>

<https://www.tandfonline.com/doi/abs/10.1080/13632469.2020.1868362?src=&journalCode=ueqe20>

For fatality/injury functions: <https://www.sciencedirect.com/science/article/pii/B9780128210871000144>

among others. There are hundreds of published literatures in the same field, at least for each section, from the same region, please try to synthesize some to juxtapose your work with the existing ones.

**Authors' Response:** Very good suggestion. The followings are our responses within the quotes (“”), most of which including the diagram are intended to be included in the main body of the revised manuscript while the supportive tables will be incorporated in the electronic supplementary material of this manuscript.

“As suggested, we went for a rigorous literature review for all the sections of this manuscript and provide here section-wise comparative analyses.

**A. Bedrock PSHA:** In order to find out the reporting's of all the Probabilistic Seismic Hazard (PSH) related researches we browsed through the publications in Scopus journals, technical literatures, open file reports, online documentations etc. wherein we could come up with comparative clustering of the Probabilistic bedrock level PGA estimated by several researchers including the present study for 10% probability of exceedance with 475years of return period in 50years for more than 50 cities of which we appraise here the clustering of Kathmandu, Guwahati, Dhaka, Kolkata, Lucknow, New Delhi, Chandigarh and Srinagar located in the present tectonic ensemble from Kashmir Himalaya to Northeast India encompassing 6 tectonic blocks viz. Kashmir Himalaya, Northwest India, Indo-Gangetic Foredeep, Bengal Basin, Eastern Himalayan Zone and Northeast India together with Nepal, Bhutan and Bangladesh. The bedrock level PGA in the all these cities from the present study are seen to fit well within the cluster ranges extracted from all the researchers as given in **Figure 11** below.

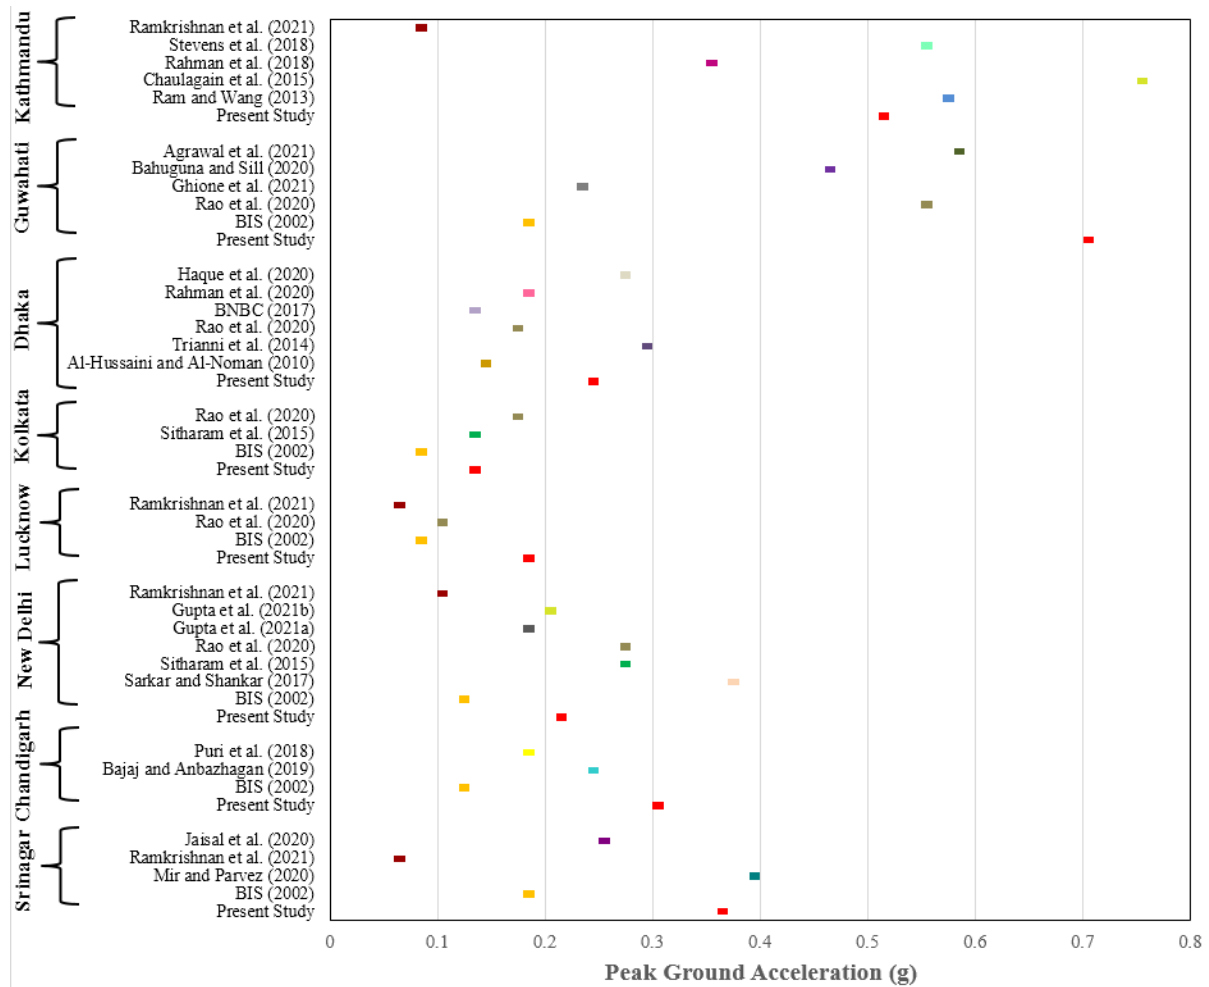

**Figure 11.** Comparative clustering of the Probabilistic bedrock level Peak Ground Acceleration estimated by several researchers including the present study for 10% probability of exceedance with 475years of return period in 50 years for the cities of Kathmandu, Guwahati, Dhaka, Kolkata, Lucknow, New Delhi, Chandigarh and Srinagar located in the present tectonic ensemble from Kashmir Himalaya to Northeast India encompassing 6 tectonic blocks together with Nepal, Bhutan and Bangladesh. The peak ground acceleration from the present study in all the cities are seen to fit well within the cluster ranges extracted from all the researchers.

Apart from this, we generated two **Tables S9** and **S10** where we presented a comparison of bedrock PGA values for 21 cities from India, Nepal, Bhutan and Bangladesh for both 10% and 2% probability of exceedance in 50years with 475years and 2475years of return periods respectively as extracted for aforementioned literatures, open file reporting's etc. and those from the present study. These two tables are intended to be incorporated in the electronic supplement of this manuscript. Our results presented in this manuscript find good agreement with many of the research reporting's as is evident from both the tables for both 475years and 2475years of return periods. The marginal variation of our probabilistic estimate and that by others are attributed to:

1. The consideration of 85 polygonal seismogenic Sources and 413 tectonic seismogenic sources inscribed within these polygonal seismogenic sources in the logic tree framework designed in the present study.
2. Usages of updated seismicity for the period 1900-2018 with three threshold magnitudes of  $M_w$  3.5, 4.5 and 5.5 in the present study.
3. Inclusion of depth-wise variation of activity rates in the present study.
4. Region-specific maximum earthquake prognosis in the present study.
5. Selection of the hordes of Ground Motion Prediction Equations(GMPE) taken from all the local-specific researches totaling to about 197 of which there had been 68 Next Generation Spectral Attenuation models (NGAs) developed by Nath (2017) and Nath et al. (2021) as a part of the present research, there had also been global GMPEs from active and passive tectonic source regime considerations, all of whose weights and ranks have been determined through Log Likelihood (LLH) calculations and finally the same assigned on the Logic Tree Framework designed for PSHA in the present study.
6. Further, in the present study, we have used both the aleatory and epistemic uncertainties associated with magnitude, rupture distance and GMPEs for all the seismogenic provinces considered here.

**Table S9.** Comparison of Peak Ground Acceleration (PGA) for 10% probability of exceedance in 50years with 475years of return period from various literatures and present study.

| Sl. No. | City Name   | PGA(g) for 10% probability of exceedance in 50years with 475years of return period |                                        |                                |               | Reference                                                                                                                                                                                                           |
|---------|-------------|------------------------------------------------------------------------------------|----------------------------------------|--------------------------------|---------------|---------------------------------------------------------------------------------------------------------------------------------------------------------------------------------------------------------------------|
|         |             | BIS (2002)<br>[zone]                                                               | GSHAP<br>(Bhatia <i>et al.</i> , 1999) | Nath and Thingbaijam<br>(2012) | Present Study |                                                                                                                                                                                                                     |
| 1       | Amritsar    | 0.12<br>[IV]                                                                       | 0.00-0.05                              | 0.20-0.25                      | 0.17-0.18     | 0.18<br>0.20-0.35<br>0.12<br>Bajaj and Anbazhagan (2019)<br>Rao et al. (2020)<br>Mir and Parvez (2020)                                                                                                              |
| 2       | Bhubaneswar | 0.08<br>[III]                                                                      | 0.00-0.05                              | 0.04-0.08                      | 0.07-0.08     | 0.05-0.08<br>0.04-0.06<br>Rao et al. (2020)<br>Scaria et al. (2021)                                                                                                                                                 |
| 3       | Chandigarh  | 0.12<br>[IV]                                                                       | 0.15-0.20                              | 0.30-0.35                      | 0.30-0.31     | 0.14-0.21<br>0.24<br>0.35-0.55<br>Puri and Jain (2018)<br>Bajaj and Anbazhagan (2019)<br>Rao et al. (2020)                                                                                                          |
| 4       | New Delhi   | 0.12<br>[IV]                                                                       | 0.10-0.15                              | 0.20-0.25                      | 0.19-0.20     | 0.27<br>0.00-0.37<br>0.2-0.35<br>0.18<br>0.07-0.33<br>0.10<br>Sitharam et al. (2015)<br>Sarkar and Shanker (2017)<br>Rao et al. (2020)<br>Gupta et al. (2021a)<br>Gupta et al. (2021b)<br>Ramkrishnan et al. (2021) |
| 5       | Guwahati    | 0.18<br>[V]                                                                        | 0.25-0.30                              | 0.60-0.70                      | 0.70-0.71     | 0.46<br>0.35-0.55<br>0.20-0.25<br>0.54-0.62<br>Bahuguna and Sil (2020)<br>Rao et al. (2020)<br>Ghione et al. (2021)<br>Agrawal et al. (2021)                                                                        |
| 6       | Kolkata     | 0.08<br>[III]                                                                      | 0.05-0.10                              | 0.12-0.16                      | 0.13-0.14     | 0.13<br>0.08-0.20<br>Sitharam et al. (2015)<br>Rao et al. (2020)                                                                                                                                                    |

|    |            |               |           |           |           |                                                        |                                                                                                                                             |
|----|------------|---------------|-----------|-----------|-----------|--------------------------------------------------------|---------------------------------------------------------------------------------------------------------------------------------------------|
| 7  | Lucknow    | 0.08<br>[III] | 0.05-0.10 | 0.16-0.20 | 0.16-0.17 | 0.08-0.13<br>0.06                                      | Rao et al. (2020)<br>Ramkrishnan et al. (2021)                                                                                              |
| 8  | Ranchi     | 0.05<br>[II]  | 0.075     | 0.12-0.16 | 0.05-0.15 | 0.04-0.06<br>0.13-0.20                                 | Scaria et al. (2021)<br>Rao et al. (2020)                                                                                                   |
| 9  | Patna      | 0.12<br>[IV]  | 0.00-0.05 | 0.20-0.25 | 0.14-0.15 | 0.11-0.15<br>0.08-0.13<br>0.04                         | Anbazhagan et al. (2019a)<br>Rao et al. (2020)<br>Ramkrishnan et al. (2021)                                                                 |
| 10 | Srinagar   | 0.18<br>[V]   | 0.20-0.25 | 0.08-0.12 | 0.36-0.37 | 0.22-0.27<br>0.39<br>0.06<br>0.35-0.55                 | Jaisal et al. (2020)<br>Mir and Parvez (2020)<br>Ramkrishnan et al. (2021)<br>Rao et al. (2020)                                             |
| 11 | Varanasi   | 0.08<br>[III] | 0.05-0.10 | 0.08-0.12 | 0.10-0.11 | 0.09-0.11<br>0.05-0.08                                 | Nath et al. (2019)<br>Rao et al. (2020)                                                                                                     |
| 12 | Dhaka      |               | 0.20-0.25 | 0.20-0.25 | 0.23-0.24 | 0.14<br>0.29<br>0.13<br>0.15-0.20<br>0.27<br>0.13-0.20 | Al-Hussaini and Al-Noman (2010)<br>Trianni et al. (2014)<br>BNBC (2017)<br>Rahman et al. (2020)<br>Haque et al. (2020)<br>Rao et al. (2020) |
| 13 | Chittagong |               | 0.35-0.40 | 0.30-0.35 | 0.35-0.36 | 0.18<br>0.13<br>0.19<br>0.40-0.50<br>0.41              | Al-Hussaini and Al-Noman (2010)<br>Trianni et al. (2014)<br>BNBC (2017)<br>Rahman et al. (2020)<br>Haque et al. (2020)                      |
| 14 | Jammu      | 0.12          | 0.10-0.15 | 0.30-0.35 | 0.33-0.34 | 0.17-0.22                                              | Jaisal et al. (2020)                                                                                                                        |

|    |           |              |           |           |           |                                                |                                                                                                                                |
|----|-----------|--------------|-----------|-----------|-----------|------------------------------------------------|--------------------------------------------------------------------------------------------------------------------------------|
|    |           | [IV]         |           |           |           | 0.35-0.55                                      | Rao et al. (2020)                                                                                                              |
| 15 | Thimphu   |              | 0.25-0.30 | 0.25-0.30 | 0.35-0.37 | 0.55-0.60<br>0.20-0.35                         | Ghione et al. (2021)<br>Rao et al. (2020)                                                                                      |
| 16 | Kathmandu |              | 0.20-0.25 | 0.45-0.5  | 0.50-0.51 | 0.51-0.55<br>0.75<br>0.35<br>0.52-0.57<br>0.08 | Ram and Wang (2013)<br>Chaulagain et al. (2015)<br>Rahman et al. (2018a)<br>Stevens et al. (2018)<br>Ramkrishnan et al. (2021) |
| 17 | Aizawl    | 0.18<br>[V]  | 0.40-0.45 | 0.50-0.55 | 0.54-0.56 | 0.35-0.55<br>0.15-0.20                         | Rao et al. (2020)<br>Ghione et al. (2021)                                                                                      |
| 18 | Imphal    | 0.18<br>[V]  | 0.40-0.45 | 0.60-0.70 | 0.68-0.69 | 0.20-0.25<br>0.55-0.90<br>0.90-1.50            | Pallav et al. (2012)<br>Rao et al. (2020)<br>Ghione et al. (2021)                                                              |
| 19 | Shillong  | 0.18<br>[V]  | 0.25-0.30 | 0.60-0.70 | 0.73-0.74 | 0.35-0.55<br>0.16<br>0.40-0.45                 | Rao et al. (2020)<br>Baro et al. (2020)<br>Ghione et al. (2021)                                                                |
| 20 | Gangtok   | 0.12<br>[IV] | 0.25-0.30 | 0.30-0.35 | 0.36-0.38 | 0.43<br>0.35-0.55<br>0.55-0.60<br>0.08         | Rahman et al. (2018a)<br>Rao et al. (2020)<br>Ghione et al. (2021)<br>Ramkrishnan et al. (2021)                                |
| 21 | Agartala  | 0.18<br>[V]  | 0.35-0.40 | 0.25-0.30 | 0.28-0.29 | 0.20-0.35                                      | Rao et al. (2020)                                                                                                              |

**Table S10.** Comparison of Peak Ground Acceleration (PGA) for 2% probability of exceedance in 50years with 2475years of return period from various literatures and present study.

| Sl. No. | City Name   | PGA(g) for 2% probability of exceedance in 50years with 2475years of return period |               |                                                        | Reference                                                                                                                                                    |
|---------|-------------|------------------------------------------------------------------------------------|---------------|--------------------------------------------------------|--------------------------------------------------------------------------------------------------------------------------------------------------------------|
|         |             | Nath and Thingbaijam (2012)                                                        | Present Study | Other Studies                                          |                                                                                                                                                              |
| 1       | Amritsar    | 0.25-0.40                                                                          | 0.40-0.42     | 0.25-0.3                                               | Sitharam et al. (2015)                                                                                                                                       |
| 2       | Bhubaneswar | 0.08-0.20                                                                          | 0.17-0.19     | 0.09-0.14<br>0.01                                      | Scaria et al. (2021)<br>Huded and Dash (2022)                                                                                                                |
| 3       | Chandigarh  | 0.35-0.70                                                                          | 0.60-0.61     | 0.24-0.4                                               | Puri and Jain (2018)                                                                                                                                         |
| 4       | New Delhi   | 0.25-0.50                                                                          | 0.42-0.43     | 0.22<br>0.51<br>0.00-0.64<br>0.32<br>0.12-0.37<br>0.18 | Iyengar and Ghosh (2004)<br>Sitharam et al. (2015)<br>Sarkar and Shanker (2017)<br>Gupta et al. (2021a)<br>Gupta et al. (2021b)<br>Ramkrishnan et al. (2021) |
| 5       | Guwahati    | 0.70-1.30                                                                          | 0.85-0.87     | 0.78<br>0.83-0.93                                      | Bahuguna and Sil (2020)<br>Agrawal et al. (2021)                                                                                                             |
| 6       | Kolkata     | 0.16-0.30                                                                          | 0.30-0.31     | 0.23                                                   | Sitharam et al. (2015)                                                                                                                                       |
| 7       | Lucknow     | 0.20-0.40                                                                          | 0.42-0.43     | 0.07-0.13<br>0.08                                      | Sitharam et al. (2013)<br>Ramkrishnan et al. (2021)                                                                                                          |
| 8       | Ranchi      | 0.30-0.40                                                                          | 0.28-0.30     | 0.09-0.14                                              | Scaria et al. (2021)                                                                                                                                         |
| 9       | Patna       | 0.25-0.40                                                                          | 0.31-0.33     | 0.05-0.44<br>0.3-0.38                                  | Anbazzhagan et al. (2015)<br>Anbazzhagan et al. (2019a)                                                                                                      |



|    |            |           |           |                                                |                                                                                                                                |
|----|------------|-----------|-----------|------------------------------------------------|--------------------------------------------------------------------------------------------------------------------------------|
|    |            |           |           | 0.08                                           | Ramkrishnan et al. (2021)                                                                                                      |
| 10 | Srinagar   | 0.30-0.40 | 0.58-0.60 | 0.69-0.70<br>0.37-0.47<br>0.08                 | Sana (2019)<br>Jaisal et al. (2020)<br>Ramkrishnan et al. (2021)                                                               |
| 11 | Varanasi   | 0.30-0.40 | 0.25-0.27 | 0.03                                           | Raghucharan and Somala (2021)                                                                                                  |
| 12 | Dhaka      | 0.50-0.60 | 0.39-0.40 | 0.30-0.40<br>0.55                              | Rahman et al. (2020)<br>Haque et al. (2020)                                                                                    |
| 13 | Chittagong | 0.70-0.80 | 0.49-0.51 | 0.9-1.0<br>0.84                                | Rahman et al. (2020)<br>Haque et al. (2020)                                                                                    |
| 14 | Jammu      | 0.60-0.70 | 0.52-0.54 | 0.27-0.37                                      | Jaisal et al. (2020)                                                                                                           |
| 15 | Kathmandu  | 0.90-1.00 | 0.76-0.78 | 1.00-1.07<br>0.66<br>0.81-0.90<br>1.00<br>0.18 | Ram and Wang (2013)<br>Chaulagain et al. (2015)<br>Rahman et al. (2018a)<br>Stevens et al. (2018)<br>Ramkrishnan et al. (2021) |
| 16 | Aizawl     | 1.00-1.10 | 0.72-0.73 | 0.13-0.20<br>0.22-0.32                         | Sil et al. (2013)<br>Agrawal et al. (2021)                                                                                     |
| 17 | Imphal     | 1.30-1.40 | 0.97-0.99 | 0.3-1.1<br>0.14<br>0.32-0.42                   | Pallav et al. (2012)<br>Das et al. (2016)<br>Agrawal et al. (2021)                                                             |
| 18 | Shillong   | 1.40-1.50 | 0.87-0.88 | 0.24<br>0.73-0.83                              | Baro et al. (2020)<br>Agrawal et al. (2021)                                                                                    |
| 19 | Gangtok    | 0.60-0.70 | 0.69-0.70 | 0.62<br>0.18                                   | Rahman et al. (2018a)<br>Ramkrishnan et al. (2021)                                                                             |

|    |          |           |           |                        |                                            |
|----|----------|-----------|-----------|------------------------|--------------------------------------------|
| 20 | Agartala | 0.50-0.60 | 0.45-0.46 | 0.20-0.27<br>0.42-0.52 | Sil et al. (2013)<br>Agrawal et al. (2021) |
|----|----------|-----------|-----------|------------------------|--------------------------------------------|

### B. $V_s^{30}$ :

In order to establish the authenticity of the measured/calculated  $V_s^{30}$  in the present study we made a comparative analysis of the same with those reported by others in several cities and urban centers of this tectonic ensemble and found an excellent match as is evident from **Table S11** given below which may also be incorporated in the electronic supplement of the main manuscript.

“**Table S11.** Comparison of effective shear wave velocity ( $V_s^{30}$ ) variation from various literatures and present study.

| Location   | $V_s^{30}$ (m/s)<br>Present study | $V_s^{30}$ (m/s)<br>Other studies | Reference                                               |
|------------|-----------------------------------|-----------------------------------|---------------------------------------------------------|
| Amritsar   | 257-370                           | 180-360                           | Anbazhagan et al. (2019b)                               |
| New Delhi  | 220-360                           | 230-350<br>270-565                | Satyam and Rao (2008)<br>Pandey et al. (2016)           |
| Lucknow    | 204-391                           | 230-470                           | Anbazhagan et al. (2013)                                |
| Patna      | 198-356                           | 180-270                           | Anbazhagan et al. (2019b)                               |
| Varanasi   | 191-356                           | 180-360<br>221-692                | Anbazhagan et al. (2019b)<br>Singh et al. (2021)        |
| Kolkata    | 160-310                           | 119-359                           | Nath et al. (2014)                                      |
| Dhaka      | 114-291                           | 127-320                           | Rahman et al. (2018b)                                   |
| Chittagong | 108-304                           | 123-420                           | Rahman et al. (2016)                                    |
| Jammu      | 250-470                           | 340-390                           | Mahajan et al. (2012)                                   |
| Chandigarh | 180-360                           | 210-290                           | Kandpal et al. (2009)                                   |
| Kathmandu  | 112-368                           | 366-490<br>148-298                | Chen et al. (2017)<br>Gautam and Chamlagain (2016)      |
| Guwahati   | 102-300                           | 180-760                           | Kumar et al. (2018)                                     |
| Aizawl     | 320-620                           | 360-760<br>200-950                | Sil and Sitharam (2017)<br>Rao and Ramhmachhuani (2017) |
| Shillong   | 248-760                           | 275-375                           | Biswas et al. (2018)                                    |
| Agartala   | 120-240                           | 180-360                           | Sil and Sitharam (2017)                                 |
| Srinagar   | 140-380                           | <180-360<br>139-451               | Sana (2018)<br>Zahoor et al. (2019)                     |

### C. Surface-consistent PGA:

A comparative study between the present surface-consistent PGA and those reported by others have also been undertaken for as many as 50 cities of which 14 significant city results have been tabulated in **Table S12** below which may also be incorporated in the Electronic supplement of the manuscript. It is evident that our result agrees to almost all the reporting thus establishing efficacy of the process protocol followed in our study.

**Table S12.** Comparison of Surface-consistent Probabilistic Peak Ground Acceleration (PGA) for 10% probability of exceedance in 50years with 475years of return period from various literatures and the present study.

| Sl. No. | City Name  | Surface-consistent PGA(g) for 10% probability of exceedance in 50years with 475years of return period |                                     | References                                                             |
|---------|------------|-------------------------------------------------------------------------------------------------------|-------------------------------------|------------------------------------------------------------------------|
|         |            | Present Study                                                                                         | Other Studies                       |                                                                        |
| 1       | Aizawl     | 0.6-0.8                                                                                               | 0.60-0.70                           | Sitharam et al. (2015)                                                 |
| 2       | Ambala     | 0.20-0.40                                                                                             | 0.299<br>0.30-0.40                  | Puri and Jain (2021)<br>Sitharam et al. (2015)                         |
| 3       | Chandigarh | 0.20-0.40                                                                                             | 0.20-0.30<br>0.30-0.40              | Puri and Jain (2018)<br>Sitharam et al. (2015)                         |
| 4       | Gangtok    | 0.4-0.6                                                                                               | 0.70                                | Sitharam et al. (2015)                                                 |
| 5       | Imphal     | 0.8-1.0                                                                                               | 0.30-0.80<br>0.63                   | Pallav et al. (2015)<br>Sitharam et al. (2015)                         |
| 6       | Itanagar   | 0.4-0.6                                                                                               | 0.60-0.70                           | Sitharam et al. (2015)                                                 |
| 7       | Kohima     | 0.8-1.0                                                                                               | 0.60-0.70                           | Sitharam et al. (2015)                                                 |
| 8       | Kolkata    | 0.20-0.40                                                                                             | 0.17-0.25<br>0.30-0.40<br>0.39      | Nath et al. (2014)<br>Sitharam et al. (2015)<br>Maiti et al. (2017)    |
| 9       | Lucknow    | 0.20-0.40                                                                                             | 0.10-0.40<br>0.26-0.29<br>0.20-0.30 | Sitharam et al. (2013)<br>Nath et al. (2019)<br>Sitharam et al. (2015) |
| 10      | New Delhi  | 0.2-0.4                                                                                               | 0.42<br>0.20                        | Sitharam et al. (2015)<br>Iyenger and Ghosh (2004)                     |
| 11      | Panipat    | 0.20-0.40                                                                                             | 0.145<br>0.20-0.30                  | Puri and Jain (2021)<br>Sitharam et al. (2015)                         |
| 12      | Patna      | 0.20-0.40                                                                                             | 0.22-0.24<br>0.20-0.30              | Nath et al. (2019)<br>Sitharam et al. (2015)                           |
| 13      | Srinagar   | 0.8-1.0                                                                                               | 0.6-0.7                             | Sitharam et al. (2015)                                                 |
| 14      | Varanasi   | 0.05-0.20                                                                                             | 0.14-0.17<br>0.20-0.30              | Nath et al. (2019)<br>Sitharam et al. (2015)                           |

**D. Structural Impact Assessment in terms of Damage Potential Modelling and Human Casualty Assessment in cities of the seismogenic Tectonic Ensemble from Kashmir Himalaya to Northeast India:**

- (i) **Building identification and classification following FEMA (2000) and WHE-PAGER (2008) nomenclature using Google Earth Imagery with due validation performed using Rapid Visual Screening, (RVS) on 25% samples of the entire ensemble and establishing user and producer accuracy and Kappa Statistics as enunciated below.**

The seismic resistant capability of a building is closely related to its structural type. The damage of a building depends on a number of factors including building type, building height, building age, building floor area, etc. In the present study, the building typology is classified based on the following image processing-cum accuracy assessment protocol given in **Figure S7**.

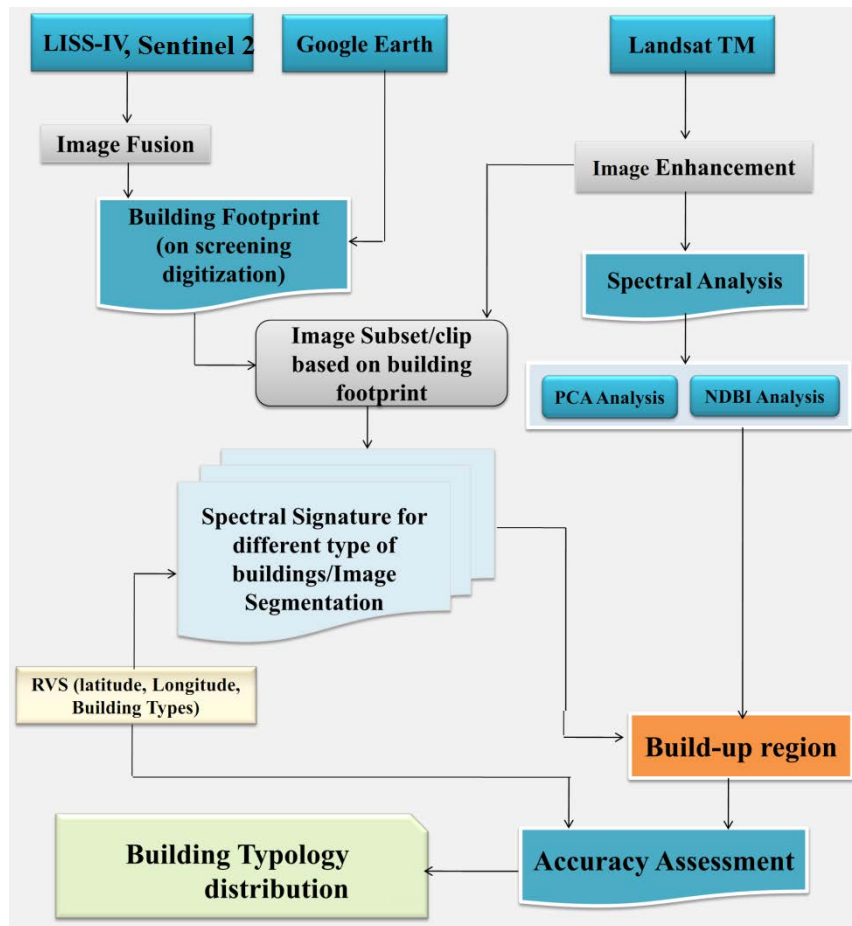

**Figure S7.** Building typology classification based on hybrid Remote Sensing and RVS processing.

These are further sub-classified using building height through the following protocol that uses Google Earth 2011 and Cartosat I Stereo Image shown in **Figure S8** to yield FEMA (2000) & WHE-PAGER (2008) nomenclature based building typology and those used in the present study for seismic structural impact assessment.

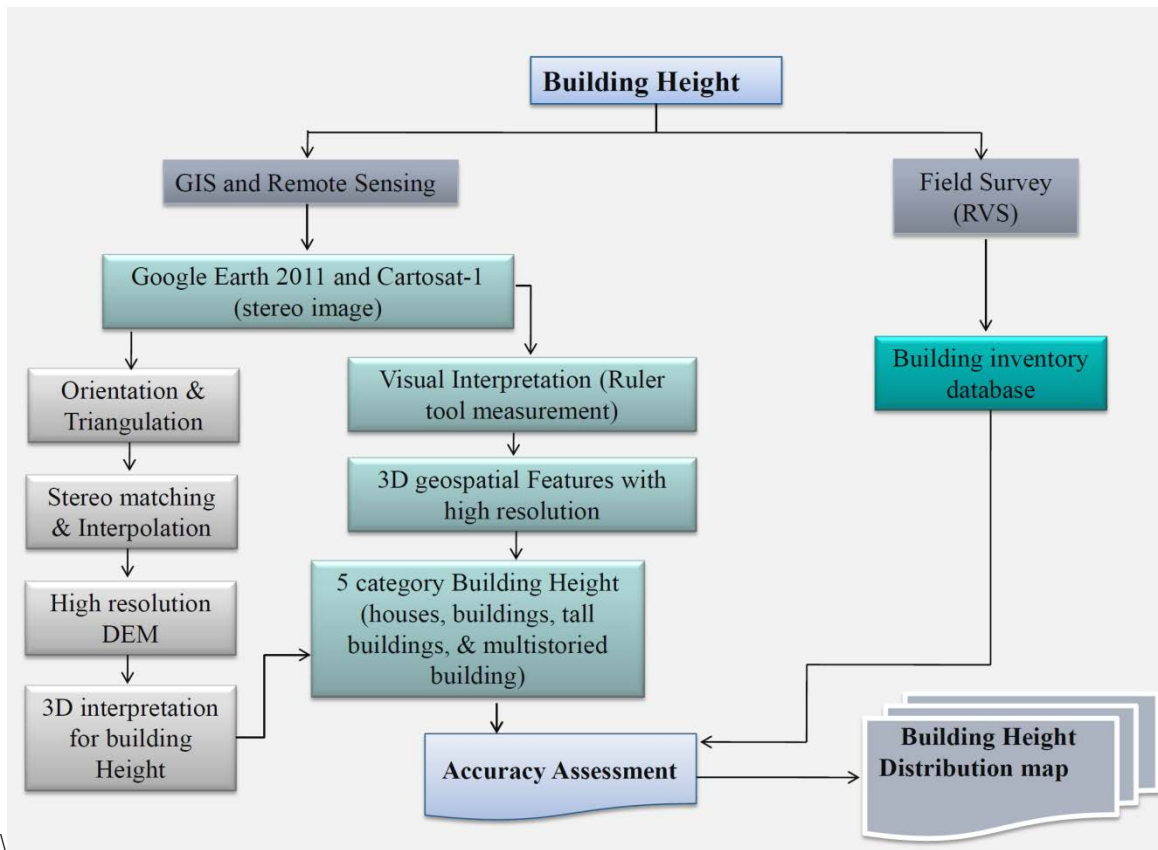

**Figure S8.** Building sub-classification protocol based on Building Height.

The most common way of representing the confidence level in the assessment of remote sensing data is in the form of computing an error matrix. It is based on the widely used accuracy assessment technique of statistical correlations between two data sets –one is the Rapid Visual Screening (RVS) of about 25-30% samples in the study region as shown in **Figure S9**, which we term as ‘reference’ and the other derived exclusively from remotely sensed data, which is termed as ‘classified’. The correlation indicators used in the present analysis include “overall accuracy”, i.e., the percentage of matched data between the ‘reference’ and the ‘classified’ data, “user’s accuracy”, i.e., the percentage of matched data in the ‘classified’ map, “producer’s accuracy”, i.e., the percentage of matched data in the ‘reference’ map.

In the present study, the structural vulnerability exposures derived from satellite imagery in case of building typology classified from Google Earth 3-D aspect, Sentinel 2, LISS-IV and Cartosat I for building height etc. are used as ‘classified’ data while those derived through Rapid Visual Screening from 25000 field survey locations in the ensemble being considered as ‘reference’ data have been used for the accuracy assessment of all the themes as given in **Tables S13** and **S14**.

|                                                                                                                                                                                                                                                                                                                                                                                                                                                                                                                                                                                                                                                  |  |                                                                                                                                                          |  |
|--------------------------------------------------------------------------------------------------------------------------------------------------------------------------------------------------------------------------------------------------------------------------------------------------------------------------------------------------------------------------------------------------------------------------------------------------------------------------------------------------------------------------------------------------------------------------------------------------------------------------------------------------|--|----------------------------------------------------------------------------------------------------------------------------------------------------------|--|
| Address: Srinagar, Jammu & Kashmir<br>Use: Commercial                                                                                                                                                                                                                                                                                                                                                                                                                                                                                                                                                                                            |  | GPS Co-ordinates: 34° 52'73"N, 74°47'41.38"E<br>No. of Stories: 3                                                                                        |  |
| <br>(a) Field Photo                                                                                                                                                                                                                                                                                                                                                                                                                                                                                                                                             |  | <br>(b) Google Earth                                                    |  |
| <b>Occupancy:</b><br>Assembly <input type="checkbox"/> Govt. <input type="checkbox"/> Office <input type="checkbox"/><br>Commercial <input type="checkbox"/> Historic <input type="checkbox"/> Residential <input type="checkbox"/><br>Emer. Service <input type="checkbox"/> Industrial <input type="checkbox"/> School <input type="checkbox"/><br>Hospital <input type="checkbox"/> Office <input type="checkbox"/>                                                                                                                                                                                                                           |  | <b>Max. No. of Person:</b><br>0-10 <input type="checkbox"/> 10-50 <input type="checkbox"/> 50-100 <input type="checkbox"/> >100 <input type="checkbox"/> |  |
| <b>*Building Type:</b><br>(FEMA, 2000 & WHE-PAGER, 2008)                                                                                                                                                                                                                                                                                                                                                                                                                                                                                                                                                                                         |  | A1 RS2 URM C1 C3 HER<br>URML URMM CIL CIM CIH C3L.C3M C3H                                                                                                |  |
| <small>*A1-Adobe Block, Mud Mortar, Wood Roof and Floors, RS2-Ureinforced stone wall rural housing, URML-Ureinforced Masonry Bearing Walls Low-Rise, URMH-Ureinforced Masonry Bearing Walls High-Rise C1L-Ductile Reinforced Concrete Moment Frame Low-Rise, *C1M-Ductile Reinforced Concrete Moment Frame Mid-Rise, *C1H-Ductile Reinforced Concrete Moment Frame High-Rise, C3L-Nonductile Reinforced Concrete Frame with Masonry Infill Walls Low-Rise, C3M-Nonductile Reinforced Concrete Frame with Masonry Infill Walls Mid-Rise, C3H-Nonductile Reinforced Concrete Frame with Masonry Infill Walls High-Rise, HER- Heritage Type</small> |  |                                                                                                                                                          |  |

|                                                                                                                                                                                                                                                                                                                                                                                                                        |  |                                                                                                                                                          |  |
|------------------------------------------------------------------------------------------------------------------------------------------------------------------------------------------------------------------------------------------------------------------------------------------------------------------------------------------------------------------------------------------------------------------------|--|----------------------------------------------------------------------------------------------------------------------------------------------------------|--|
| Address: Sector 35, Chandigarh<br>Use: Commercial                                                                                                                                                                                                                                                                                                                                                                      |  | GPS Co-ordinates: 30°44'14.62"N, 76°44'52.39"E<br>No. of Stories: 6                                                                                      |  |
| <br>(a) Field Photo                                                                                                                                                                                                                                                                                                                   |  | <br>(b) Google Earth                                                  |  |
| <b>Occupancy:</b><br>Assembly <input type="checkbox"/> Govt. <input type="checkbox"/> Office <input type="checkbox"/><br>Commercial <input type="checkbox"/> Historic <input type="checkbox"/> Residential <input type="checkbox"/><br>Emer. Service <input type="checkbox"/> Industrial <input type="checkbox"/> School <input type="checkbox"/><br>Hospital <input type="checkbox"/> Office <input type="checkbox"/> |  | <b>Max. No. of Person:</b><br>0-10 <input type="checkbox"/> 10-50 <input type="checkbox"/> 50-100 <input type="checkbox"/> >100 <input type="checkbox"/> |  |
| <b>*Building Type:</b><br>(FEMA, 2000 & WHE-PAGER, 2008)                                                                                                                                                                                                                                                                                                                                                               |  | A1 RS2 URM C1 C3 HER<br>URML URMM CIL CIM CIH C3L.C3M C3H                                                                                                |  |

|                                                                                                                                                                                                                                                                                                                                                                                                                        |  |                                                                                                                                                          |  |
|------------------------------------------------------------------------------------------------------------------------------------------------------------------------------------------------------------------------------------------------------------------------------------------------------------------------------------------------------------------------------------------------------------------------|--|----------------------------------------------------------------------------------------------------------------------------------------------------------|--|
| Address: Gurugram, Haryana<br>Use: Commercial                                                                                                                                                                                                                                                                                                                                                                          |  | GPS Co-ordinates: 28°27'26.76"N, 77° 14'1.78"E<br>No. of Stories: 6                                                                                      |  |
| <br>(a) Field Photo                                                                                                                                                                                                                                                                                                                   |  | <br>(b) Google Earth                                                    |  |
| <b>Occupancy:</b><br>Assembly <input type="checkbox"/> Govt. <input type="checkbox"/> Office <input type="checkbox"/><br>Commercial <input type="checkbox"/> Historic <input type="checkbox"/> Residential <input type="checkbox"/><br>Emer. Service <input type="checkbox"/> Industrial <input type="checkbox"/> School <input type="checkbox"/><br>Hospital <input type="checkbox"/> Office <input type="checkbox"/> |  | <b>Max. No. of Person:</b><br>0-10 <input type="checkbox"/> 10-50 <input type="checkbox"/> 50-100 <input type="checkbox"/> >100 <input type="checkbox"/> |  |
| <b>*Building Type:</b><br>(FEMA, 2000 & WHE-PAGER, 2008)                                                                                                                                                                                                                                                                                                                                                               |  | A1 RS2 URM C1 C3 HER<br>URML URMM CIL CIM CIH C3L.C3M C3H                                                                                                |  |

|                                                                                                                                                                                                                                                                                                                                                                                                                        |  |                                                                                                                                                          |  |
|------------------------------------------------------------------------------------------------------------------------------------------------------------------------------------------------------------------------------------------------------------------------------------------------------------------------------------------------------------------------------------------------------------------------|--|----------------------------------------------------------------------------------------------------------------------------------------------------------|--|
| Address: Kanpur, Uttar Pradesh<br>Use: School                                                                                                                                                                                                                                                                                                                                                                          |  | GPS Co-ordinates: 26°25'43.20"N, 80°18'44.51"E<br>No. of Stories: 3                                                                                      |  |
| <br>(a) Field Photo                                                                                                                                                                                                                                                                                                                  |  | <br>(b) Google Earth                                                  |  |
| <b>Occupancy:</b><br>Assembly <input type="checkbox"/> Govt. <input type="checkbox"/> Office <input type="checkbox"/><br>Commercial <input type="checkbox"/> Historic <input type="checkbox"/> Residential <input type="checkbox"/><br>Emer. Service <input type="checkbox"/> Industrial <input type="checkbox"/> School <input type="checkbox"/><br>Hospital <input type="checkbox"/> Office <input type="checkbox"/> |  | <b>Max. No. of Person:</b><br>0-10 <input type="checkbox"/> 10-50 <input type="checkbox"/> 50-100 <input type="checkbox"/> >100 <input type="checkbox"/> |  |
| <b>*Building Type:</b><br>(FEMA, 2000 & WHE-PAGER, 2008)                                                                                                                                                                                                                                                                                                                                                               |  | A1 RS2 URM C1 C3 HER<br>URML URMM CIL CIM CIH C3L.C3M C3H                                                                                                |  |

|                                                                                                                                                                                                                                                                                                                                                                                                                        |  |                                                                                                                                                          |  |
|------------------------------------------------------------------------------------------------------------------------------------------------------------------------------------------------------------------------------------------------------------------------------------------------------------------------------------------------------------------------------------------------------------------------|--|----------------------------------------------------------------------------------------------------------------------------------------------------------|--|
| Address: Asansol, West Bengal<br>Use: Hospital                                                                                                                                                                                                                                                                                                                                                                         |  | GPS Co-ordinates: 23°40'57.87"N, 86°55'25.50"E<br>No. of Stories: 2                                                                                      |  |
| <br>(a) Field Photo                                                                                                                                                                                                                                                                                                                  |  | <br>(b) Google Earth                                                   |  |
| <b>Occupancy:</b><br>Assembly <input type="checkbox"/> Govt. <input type="checkbox"/> Office <input type="checkbox"/><br>Commercial <input type="checkbox"/> Historic <input type="checkbox"/> Residential <input type="checkbox"/><br>Emer. Service <input type="checkbox"/> Industrial <input type="checkbox"/> School <input type="checkbox"/><br>Hospital <input type="checkbox"/> Office <input type="checkbox"/> |  | <b>Max. No. of Person:</b><br>0-10 <input type="checkbox"/> 10-50 <input type="checkbox"/> 50-100 <input type="checkbox"/> >100 <input type="checkbox"/> |  |
| <b>*Building Type:</b><br>(FEMA, 2000 & WHE-PAGER, 2008)                                                                                                                                                                                                                                                                                                                                                               |  | A1 RS2 URM C1 C3 HER<br>URML URMM CIL CIM CIH C3L.C3M C3H                                                                                                |  |

|                                                                                                                                                                                                                                                                                                                                                                                                                        |  |                                                                                                                                                          |  |
|------------------------------------------------------------------------------------------------------------------------------------------------------------------------------------------------------------------------------------------------------------------------------------------------------------------------------------------------------------------------------------------------------------------------|--|----------------------------------------------------------------------------------------------------------------------------------------------------------|--|
| Address: Shillong, Meghalaya<br>Use: Government                                                                                                                                                                                                                                                                                                                                                                        |  | GPS Co-ordinates: 25°33'49.21"N, 91°53'34.24"E<br>No. of Stories: 3                                                                                      |  |
| <br>(a) Field Photo                                                                                                                                                                                                                                                                                                                 |  | <br>(b) Google Earth                                                 |  |
| <b>Occupancy:</b><br>Assembly <input type="checkbox"/> Govt. <input type="checkbox"/> Office <input type="checkbox"/><br>Commercial <input type="checkbox"/> Historic <input type="checkbox"/> Residential <input type="checkbox"/><br>Emer. Service <input type="checkbox"/> Industrial <input type="checkbox"/> School <input type="checkbox"/><br>Hospital <input type="checkbox"/> Office <input type="checkbox"/> |  | <b>Max. No. of Person:</b><br>0-10 <input type="checkbox"/> 10-50 <input type="checkbox"/> 50-100 <input type="checkbox"/> >100 <input type="checkbox"/> |  |
| <b>*Building Type:</b><br>(FEMA, 2000 & WHE-PAGER, 2008)                                                                                                                                                                                                                                                                                                                                                               |  | A1 RS2 URM C1 C3 HER<br>URML URMM CIL CIM CIH C3L.C3M C3H                                                                                                |  |

|                                                                                                                                                                                                                                                                                                                                                                                                                        |  |                                                                                                                                                          |  |
|------------------------------------------------------------------------------------------------------------------------------------------------------------------------------------------------------------------------------------------------------------------------------------------------------------------------------------------------------------------------------------------------------------------------|--|----------------------------------------------------------------------------------------------------------------------------------------------------------|--|
| Address: Imphal, Manipur<br>Use: Commercial & Residential                                                                                                                                                                                                                                                                                                                                                              |  | GPS Co-ordinates: 24°49'8.99"N, 93°56'3.29"E<br>No. of Stories: 2                                                                                        |  |
| <br>(a) Field Photo                                                                                                                                                                                                                                                                                                                 |  | <br>(b) Google Earth                                                  |  |
| <b>Occupancy:</b><br>Assembly <input type="checkbox"/> Govt. <input type="checkbox"/> Office <input type="checkbox"/><br>Commercial <input type="checkbox"/> Historic <input type="checkbox"/> Residential <input type="checkbox"/><br>Emer. Service <input type="checkbox"/> Industrial <input type="checkbox"/> School <input type="checkbox"/><br>Hospital <input type="checkbox"/> Office <input type="checkbox"/> |  | <b>Max. No. of Person:</b><br>0-10 <input type="checkbox"/> 10-50 <input type="checkbox"/> 50-100 <input type="checkbox"/> >100 <input type="checkbox"/> |  |
| <b>*Building Type:</b><br>(FEMA, 2000 & WHE-PAGER, 2008)                                                                                                                                                                                                                                                                                                                                                               |  | A1 RS2 URM C1 C3 HER<br>URML URMM CIL CIM CIH C3L.C3M C3H                                                                                                |  |

|                                                                                                                                                                                                                                                                                                                                                                                                                        |  |                                                                                                                                                          |  |
|------------------------------------------------------------------------------------------------------------------------------------------------------------------------------------------------------------------------------------------------------------------------------------------------------------------------------------------------------------------------------------------------------------------------|--|----------------------------------------------------------------------------------------------------------------------------------------------------------|--|
| Address: Itanagar, Arunachal Pradesh<br>Use: Government                                                                                                                                                                                                                                                                                                                                                                |  | GPS Co-ordinates: 27° 45'6.71"N, 93°36'1.81"E<br>No. of Stories: 3                                                                                       |  |
| <br>(a) Field Photo                                                                                                                                                                                                                                                                                                                |  | <br>(b) Google Earth                                                |  |
| <b>Occupancy:</b><br>Assembly <input type="checkbox"/> Govt. <input type="checkbox"/> Office <input type="checkbox"/><br>Commercial <input type="checkbox"/> Historic <input type="checkbox"/> Residential <input type="checkbox"/><br>Emer. Service <input type="checkbox"/> Industrial <input type="checkbox"/> School <input type="checkbox"/><br>Hospital <input type="checkbox"/> Office <input type="checkbox"/> |  | <b>Max. No. of Person:</b><br>0-10 <input type="checkbox"/> 10-50 <input type="checkbox"/> 50-100 <input type="checkbox"/> >100 <input type="checkbox"/> |  |
| <b>*Building Type:</b><br>(FEMA, 2000 & WHE-PAGER, 2008)                                                                                                                                                                                                                                                                                                                                                               |  | A1 RS2 URM C1 C3 HER<br>URML URMM CIL CIM CIH C3L.C3M C3H                                                                                                |  |

**Figure S9.** Rapid Visual Screening (RVS) survey for field and satellite imagery comparisons of existing building type and height in selected urban centers.

**Table S13.** Error matrix derived for building height.

| Classified Building Height | RVS based Building Height (Reference data) |           |                |                        |             |       | User's Accuracy (%) |
|----------------------------|--------------------------------------------|-----------|----------------|------------------------|-------------|-------|---------------------|
|                            | Houses                                     | Buildings | Tall Buildings | Multistoried Buildings | Skyscrapers | Total |                     |
|                            | Houses (1 Floor)                           | 205       | 47             | 0                      | 0           | 0     |                     |

|                      |                                            |       |       |       |       |     |     |       |       |
|----------------------|--------------------------------------------|-------|-------|-------|-------|-----|-----|-------|-------|
|                      | Buildings<br>(2-4 Floors)                  | 25    | 149   | 15    | 0     | 0   | 189 | 78.84 |       |
|                      | Tall<br>Buildings<br>(5-8 Floors)          | 0     | 5     | 105   | 23    | 0   | 133 | 78.94 |       |
|                      | Multistoried<br>Buildings<br>(9-10 Floors) | 0     | 0     | 15    | 63    | 0   | 78  | 80.76 |       |
|                      | Skyscrapers<br>(>10 Floors)                | 0     | 0     | 0     | 0     | 10  | 10  | 100   |       |
|                      | Total                                      | 230   | 201   | 135   | 86    | 10  |     |       |       |
| Producer's<br>(%)    | Accuracy                                   | 89.13 | 74.13 | 77.78 | 73.26 | 100 |     |       |       |
| Overall Accuracy (%) |                                            |       |       |       |       |     |     |       | 80.36 |

**Table S14.** Error matrix derived for building typology

| RVS based building typology<br>(Reference data) |       |    |     |      |      |     |     |     |     |     |     |     |       | User's<br>Accuracy<br>(%) |
|-------------------------------------------------|-------|----|-----|------|------|-----|-----|-----|-----|-----|-----|-----|-------|---------------------------|
| Classified building typology                    |       | A1 | RS2 | URMM | URML | C1L | C1M | C1H | C3L | C3M | C3H | HER | Total |                           |
|                                                 | A1    | 15 | 4   | 1    | 0    | 0   | 0   | 0   | 0   | 0   | 0   | 0   | 20    | 75.00                     |
|                                                 | RS2   | 10 | 70  | 6    | 0    | 0   | 0   | 0   | 0   | 0   | 0   | 0   | 86    | 81.40                     |
|                                                 | URMM  | 5  | 17  | 100  | 20   | 0   | 0   | 0   | 0   | 0   | 0   | 0   | 142   | 70.42                     |
|                                                 | URML  | 0  | 3   | 43   | 189  | 8   | 0   | 0   | 0   | 0   | 0   | 0   | 243   | 77.78                     |
|                                                 | C1L   | 0  | 0   | 8    | 21   | 156 | 4   | 0   | 0   | 0   | 0   | 0   | 189   | 82.54                     |
|                                                 | C1M   | 0  | 0   | 0    | 2    | 31  | 120 | 9   | 0   | 0   | 0   | 0   | 162   | 74.07                     |
|                                                 | C1H   | 0  | 0   | 0    | 0    | 4   | 15  | 90  | 0   | 0   | 0   | 0   | 109   | 82.57                     |
|                                                 | C3L   | 0  | 0   | 0    | 0    | 0   | 0   | 10  | 107 | 2   | 0   | 0   | 119   | 89.92                     |
|                                                 | C3M   | 0  | 0   | 0    | 0    | 0   | 0   | 0   | 7   | 19  | 87  | 0   | 113   | 76.99                     |
|                                                 | C3H   | 0  | 0   | 0    | 0    | 0   | 0   | 0   | 0   | 7   | 63  | 0   | 70    | 90.00                     |
|                                                 | HER   | 0  | 0   | 0    | 0    | 0   | 0   | 0   | 0   | 0   | 0   | 5   | 5     | 100.00                    |
|                                                 | Total | 30 | 94  | 158  | 232  | 199 | 139 | 109 | 114 | 96  | 82  | 5   |       |                           |



|                         |       |       |       |       |       |       |       |       |       |       |        |  |  |
|-------------------------|-------|-------|-------|-------|-------|-------|-------|-------|-------|-------|--------|--|--|
| Producer's Accuracy (%) | 50.00 | 74.47 | 63.29 | 81.47 | 78.39 | 86.33 | 82.57 | 93.86 | 90.63 | 76.83 | 100.00 |  |  |
| Overall Accuracy (%):   | 79.65 |       |       |       |       |       |       |       |       |       |        |  |  |

Finally, thus through RVS, Google Earth 3-D aspect, Sentinel 2, LISS IV and Cartosat I Imagery analyses we detected 11 model building types in the entire tectonic ensemble as tabulated in **Table S15**.

**Table S15.** Different model building types used in the present study (FEMA, 2000; WHE-PAGER, 2008).

| Model Building Type | Description                                                     | Height    | Stories |
|---------------------|-----------------------------------------------------------------|-----------|---------|
| HER                 | Heritage building                                               |           |         |
| C1L                 | Ductile reinforced concrete frame with or without infill        | Low-Rise  | 1 – 3   |
| C1M                 |                                                                 | Mid-Rise  | 4 - 6   |
| C1H                 |                                                                 | High-Rise | 7+      |
| C3L                 | Non-ductile reinforced concrete frame with masonry infill walls | Low-Rise  | 1 - 3   |
| C3M                 |                                                                 | Mid-Rise  | 4 - 6   |
| C3H                 |                                                                 | High-Rise | 7+      |
| A1                  | Adobe Block, Mud Mortar, Wood Roof and Floors                   | Low-Rise  | 1-2     |
| RS2                 | Rubble stone masonry walls with timber frame and roof           | Low-Rise  | 1-2     |
| URML                | Unreinforced masonry bearing wall                               | Low-Rise  | 1-3     |
| URMM                |                                                                 | Mid-Rise  | 3+      |

**(ii) Generation of Damage Probability in the three tectonic territories viz. West-Northwest India, North-Central Himalaya and Northeast India including Nepal, Bhutan and Bangladesh**

Damageability functions, defined as the probability of sustaining any damage are obtained by plotting damage probability against intensity or any other ground shaking parameters like PGA, PGV, PGD as had been worked out by Gautam et al. (2021) for stone masonry buildings in Nepal considering 1934 Bihar-Nepal earthquake of  $M_w$  8.1, 1988 Nepal-Bihar earthquake of  $M_w$  6.9 and 2015 Gorkha-Nepal earthquake of  $M_w$  7.8 wherein 95-100% of this building type defined by FEMA (2000), WHE-PAGER (2008) as URM type had been projected to have been damaged for a GMPE predicted PGA value of 0.78g. Following suggestions from the Reviewer and taking clue from the works of Gautam et al. (2021) a rigorous literature survey has been conducted by us as detailed below and damage data have been collected as reported to have been inflicted by large and great Historical earthquakes in Nepal, Bhutan as suggested by the Reviewer and also extended the effort to the three seismogenic tectonic territories of the present ensemble viz. West-Northwest Himalaya, North-Central Himalaya and Northeast India and worked out damageability functions in all of them for three model building typologies viz. Adobe (A1), Unreinforced Masonry (URM) bearing structures and Reinforced Concrete (RC) structures in the ensemble. As we are all aware, the entire Himalayan belt frequently experiences major earthquakes due to continuous convergence of Indian plate beneath the Eurasian plate. Nepal, being centrally located in the belt, is worst affected. The number of buildings damaged during 1833 Nepal earthquake of  $M_w$  7.6 is about 18,000 in the Kathmandu valley. The 1934 Bihar-Nepal earthquake of  $M_w$  8.1 affected 200,000 buildings in the eastern mountains of Nepal

and northern Bihar of India. 1966 Bajhang earthquake of  $M_w$  6.3 damaged 7844 buildings in the western Nepal as reported by Bilham (1995), Pandey & Molnar (1988) and Chaulagain et al. (2018) for these earthquakes respectively. A1 and URM-type buildings were mostly prevalent in those regions at the time when the aforementioned earthquakes jolted those territories. 1980 Chainpur earthquake of  $M_w$  6.5 is the only major event that occurred in the western section of the central seismic gap and Singh (1982) reported that approximately 32,186 buildings were damaged during that earthquake. The 1988 Nepal-Bihar earthquake of  $M_w$  6.9 damaged about 70,000 buildings and triggered widespread liquefaction in eastern Nepal as documented by Gupta (1988) and Fujiwara et al. (1989). The recent earthquake damage statistics are available at the Nepal Disaster Risk Reduction Portal (<http://drrportal.gov.np/>). The 2011 Sikkim earthquake of  $M_w$  6.9 and 2015 Gorkha-Nepal earthquake of  $M_w$  7.8 have also been considered in the present study for structural impact assessment.

This work has been extended for the North-Central Himalaya region and it is found that Bihar and Uttar Pradesh of India have been remarkably affected by the same earthquakes. Dasgupta and Mukhopadhyay (2015) has assembled all the reports and commentaries on 1833 Nepal earthquake of  $M_w$  7.6 and it is reported that in the towns of Munger, Muzaffarpur, Arrah and Gorakhpur there had been building damages. There had been reporting of 149124 buildings in Bihar being damaged during 1988 Nepal-Bihar Earthquake of  $M_w$  6.9. About 145 adobe-type buildings were damaged in Northern Bihar due to 2015 Gorkha-Nepal Earthquake of  $M_w$  7.8.

The Northeast India region including Bhutan have repeatedly been struck by devastating earthquakes causing significant damage to life and properties. The District Disaster Management Department of the Government of Bhutan reported district-wise building damage due to past devastating earthquakes occurring in the region like, approximately 251 A1 and RC-type buildings getting damaged due to 2003 Paro earthquake of  $M_w$  5.5, around 126 URM and RC-type buildings getting damaged due to 2006 Dewangthang earthquake of  $M_w$  5.8 and about 5967 buildings getting damaged due to 2009 Bhutan earthquake of  $M_w$  6.1. Chettri et al. (2021) presented an overview of seismic vulnerability of Bhutanese residential buildings and reported that 4950 buildings were damaged during 2009 Bhutan earthquake of  $M_w$  6.1 and 7965 buildings were damaged during 2011 Sikkim earthquake of  $M_w$  6.9. According to Gautam et al. (2022), 60% of all buildings in Bhutan were exposed to 2021 Sonitpur earthquake of  $M_w$  6.4, among those 16 buildings collapsed, 541 buildings sustained major damage and 2277 buildings sustained minor damage. Halder et al. (2020) reported the extent of damage caused to buildings of various typologies by large earthquakes that occurred in Northeast India, amongst which 6727 mud-walled (Adobe-type) houses suffered partial to complete damage in the state of Tripura consequent upon 2017 Ambasa earthquake of  $M_w$  5.7 while slight to moderate damage occurred to the houses due to the impact of 2016 Manipur earthquake of  $M_w$  6.7 in Imphal, 2021 Sonitpur earthquake of  $M_w$  6.4 in and around Sonitpur in Assam and 2011 Sikkim earthquake of  $M_w$  6.9 in Sikkim. Damages have been reported by Debbarma et al. (2021) and Dey et al. (2022). The National Disaster Management Authority has reported maximum damage in North Sikkim region where 78%, 70% and 60% of A1, URM and RC type buildings have been damaged respectively due to 2011 Sikkim earthquake of  $M_w$  6.9 while the West and East Sikkim also experienced considerable damage. According to Dutta et al. (2015), 2422 buildings have been damaged in Gangtok itself.

West-Northwest Himalaya has been jolted by numerous earthquakes from historic times. Mukhopadhyay and Dasgupta (2015) has compiled the extent of damage caused due to impact of large historical earthquakes in and around Kashmir and Kangra Valley viz. 1803 Garhwal earthquake of  $M_w$  7.5, 1828 Srinagar earthquake of  $M_w$  6.5 and 1905 Kangra earthquake of  $M_w$  7.8. The Kinnaur and Lahul-Spiti districts of Himachal Pradesh were

severely affected by 1975 Kinnaur earthquake of  $M_w$  6.8 heavily damaging about 2000 houses in that around the region as reported by Singh et al. (1976) and Bhargava et al. (1978). The 1991 Uttarkashi earthquake of  $M_w$  6.8 has rocked Garhwal Himalaya of Northern India with MM intensity of VIII causing complete collapse of 20184 houses and partially damaging 74714 houses (Arya, 1994). District-wise number of building damages has been documented in a report published by Geological Survey of India (GSI, 1992). Pandey (2013) reported that damage was observed in more than 64000 unreinforced masonry buildings as well as reinforced concrete frame structures. Himachal Pradesh State Disaster Management Authority (<https://hpsdma.nic.in/>) has reported that more than 70% houses developed cracks in the epicentral region during 1995 Chamba earthquake of  $M_w$  4.9, maximum damage being experienced in Pilure-Baraur sector located 8-10 km northeast of Chamba town as reported by Mahajan (1998). Field observations after 1997 Sundernagar earthquake of  $M_w$  4.7 in Sundernagar region and around Mandi district of Himachal Pradesh have been compiled by Thakur et al. (1997) reporting extensive damages to about 1000 adobe houses and developing small cracks in concrete structures. A report by Paul (2000) on 1999 Chamoli earthquake of  $M_w$  6.5 has detailed the damages observed in the Chamoli region. Several such accounts have been collected regarding 2004 Dharamshala earthquake of  $M_w$  4.9, 2005 Muzaffarabad earthquake of  $M_w$  7.6, 2012 Jhajjar earthquake of  $M_w$  5.1, 2013 Bhaderwah-Kishtwar earthquake of  $M_w$  5.1 and 2019 Kashmir earthquake of  $M_w$  5.6 with reporting of considerable damage to unreinforced masonry and reinforced concrete buildings prevalent in recent times. The 2005 Muzaffarabad earthquake of  $M_w$  7.6, the worst ever earthquake that shook the Kashmir valley with its epicentre located 124 km to the west of Srinagar, caused widespread destruction and casualties (>50,000) in the region as detailed in Mahajan (2006). Kumar and Murty (2014) reported that about 450000 houses have been destroyed in Kashmir. Gupta et al. (2013) has compiled all the reports in context of 2012 Jhajjar earthquake of  $M_w$  5.1 affecting the Haryana-Delhi border region depicting the damage patterns along with MM intensity variation of III-VI in the region due to this earthquake.

Based on the reported number of buildings damaged during impinging large, strong and great earthquakes against the total number of buildings actually existent in the same period extracted through remote sensing technique using the imagery data prevalent during that particular period Damage Probability has been calculated and plotted against the Modified Mercalli Intensity (MMI) for North-Central Himalaya, Nepal, Northeast India, Bhutan and West-Northwest India as presented in **Figures 22(a-c), 23(a-c), 24(a-c), 25(a-c) and 26(a-c)** respectively for Adobe(A1), Unreinforced Masonry (URM) and Reinforced Concrete (RC) model building types for these tectonic territories in the ensemble. We invoked SELENA (Molina et al., 2014) package for assessing damage states of all 11 building types including A1, URM and RC type buildings for all the scenario earthquakes as well as the surface-consistent probabilistic seismic hazard in terms of surface level PGA(g) distribution in all these territories and ascertained the damage state domains for these three building types A1, URM and RC in all the territories and juxtaposed the same tectonic territory-wise on each of these diagrams as shown in **Figures 22, 23, 24, 25 and 26** depicting the four damage states viz. ‘Slight’, ‘Moderate’, ‘Extensive’ and ‘Complete’ for all the three model building types. It is evident from these diagrams that all building damages reported by till date for all the aforementioned earthquakes have been classified in the SELENA modelled four damage state domains in all the aforementioned tectonic territories, thus, bringing in a good agreement between the SELENA generated building damage state for A1, URM and RC-type buildings and damage probability distribution variation against Modified Mercalli Intensity and/or equivalent converted PGA(g) in all the three seismogenic tectonic territories

including Nepal and Bhutan for all the scenario earthquakes as well as surface-consistent probabilistic seismic hazard distribution.

(a) SELENA generated hybrid predicted & scenario combined damage state domain demarcation for A1-type buildings in North-Central Himalaya region

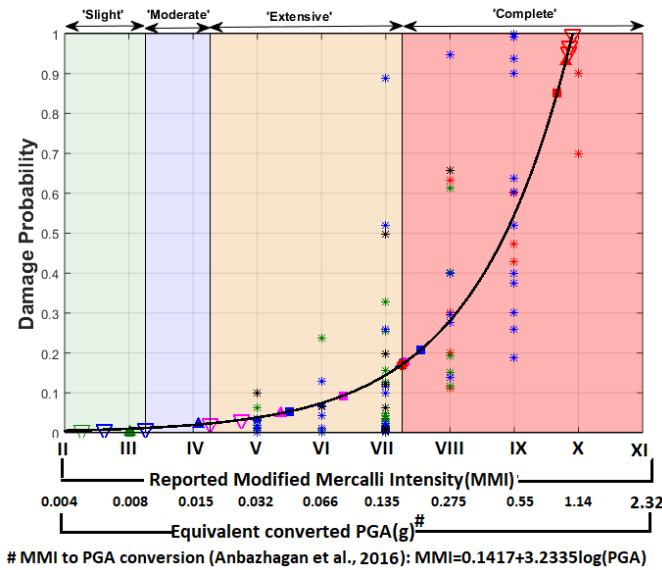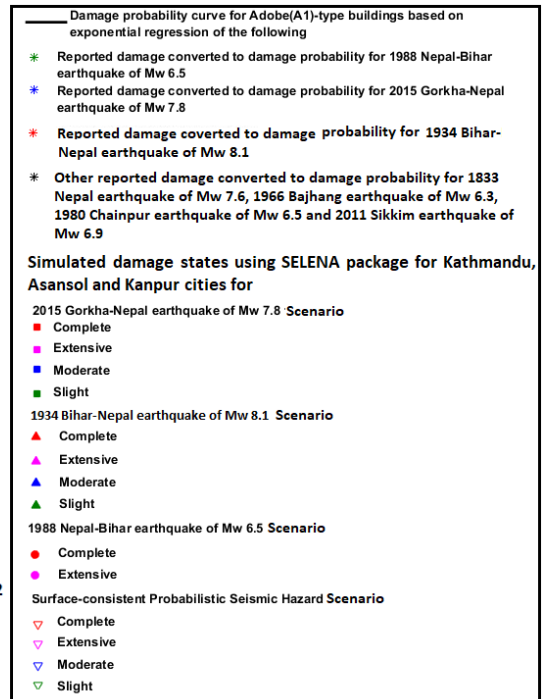

(b) SELENA generated hybrid predicted & scenario combined damage state domain demarcation for URM-type buildings in North-Central Himalaya region

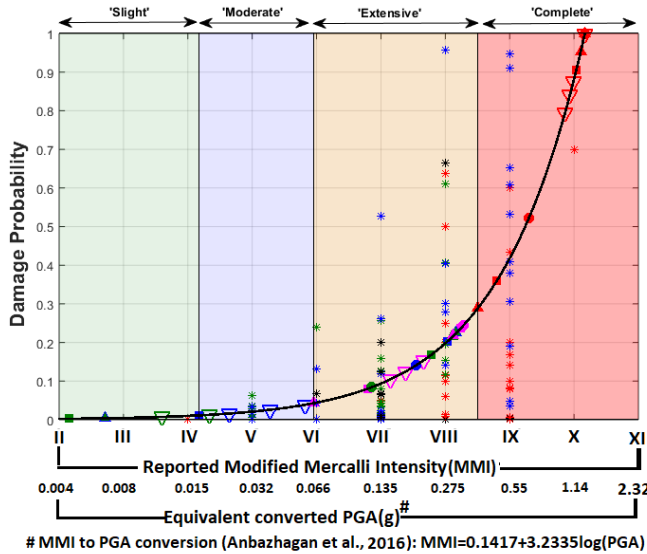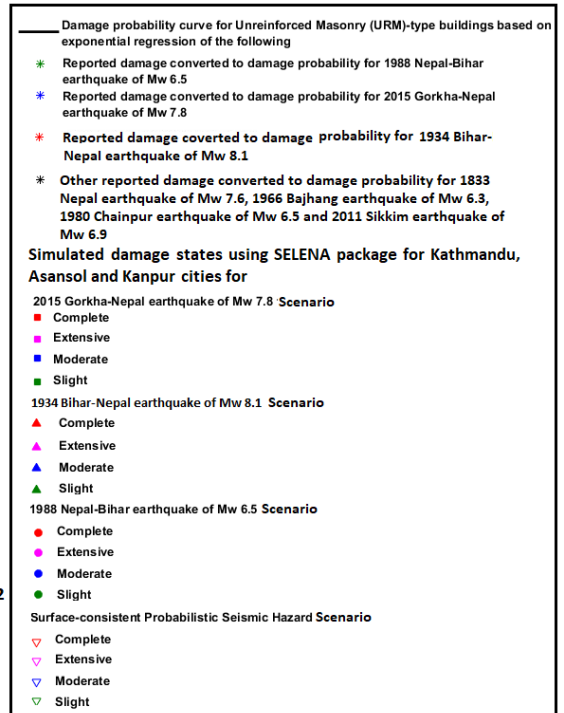

(c) SELENA generated hybrid predicted & scenario combined damage state domain demarcation for RC-type buildings in North-Central Himalaya region

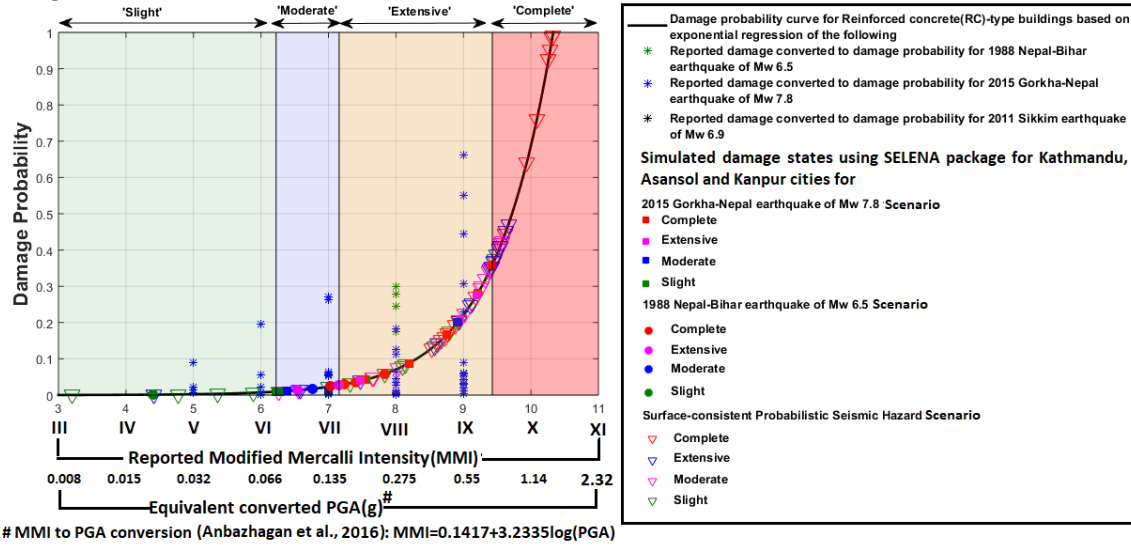

**Figure 22.** Damage probability curve for North-Central Himalaya region for (a) Adobe (A1), (b) Unreinforced Masonry (URM) and (c) Reinforced Concrete (RC)-type buildings based on exponential regression of reported damage converted to damage probability for different earthquake scenarios. SELENA generated hybrid predicted and scenario combined damage states have been demarcated based on simulated damage states for three earthquake scenarios viz. 1934 Bihar-Nepal earthquake of  $M_w$  8.1, 1988 Nepal-Bihar earthquake of  $M_w$  6.9 and 2015 Gorkha-Nepal earthquake of  $M_w$  7.8 and Surface-consistent Probabilistic Seismic Hazard scenario.

(a) SELENA generated hybrid predicted & scenario combined damage state domain demarcation for A1-type buildings in Nepal region

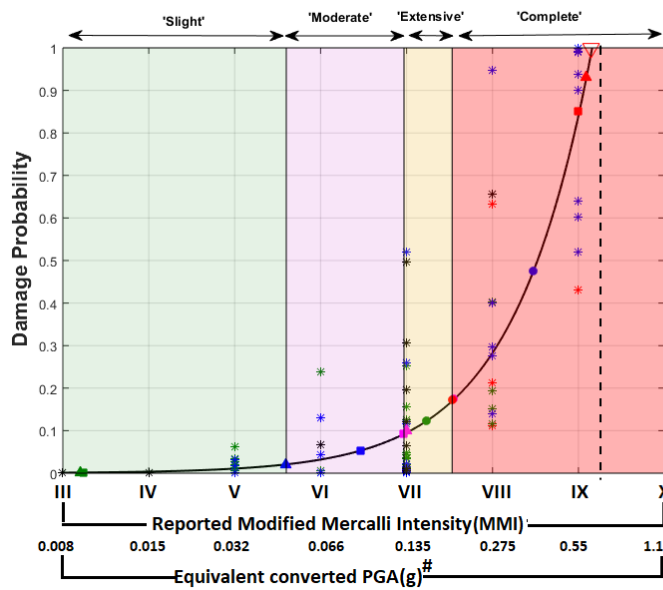

— Damage Probability Curve for Adobe (A1) type buildings based on exponential regression of the following

- \* Reported damage converted to damage probability for 1934 Bihar-Nepal earthquake of Mw 8.1
- \* Reported damage converted to damage probability for 1988 Nepal-Bihar earthquake of Mw 6.5
- \* Reported damage converted to damage probability for 2015 Gorkha-Nepal earthquake of Mw 7.8
- \* Other reported damage converted to damage probability for 1833 Nepal earthquake of Mw 7.6, 1966 Bajhang earthquake of Mw 6.3, 1980 Chainpur earthquake of Mw 6.5 and 2011 Sikkim earthquake of Mw 6.9

**Simulated damage states using SELENA package for**

**1934 Bihar-Nepal earthquake of Mw 8.1 Scenario**

- ▲ Complete
- ▲ Extensive
- ▲ Moderate
- ▲ Slight

**1988 Nepal-Bihar earthquake of Mw 6.5 Scenario**

- Complete
- Extensive
- Moderate
- Slight

**2015 Gorkha-Nepal earthquake of Mw 7.8 Scenario**

- Complete
- Extensive
- Moderate
- Slight

Surface-consistent Probabilistic Seismic Hazard Scenario

- ▽ Complete

# MMI to PGA conversion (Anbazhagan et al., 2016):  $MMI=0.1417+3.2335\log(PGA)$

(b) SELENA generated hybrid predicted & scenario combined damage state domain demarcation for URM-type buildings in Nepal

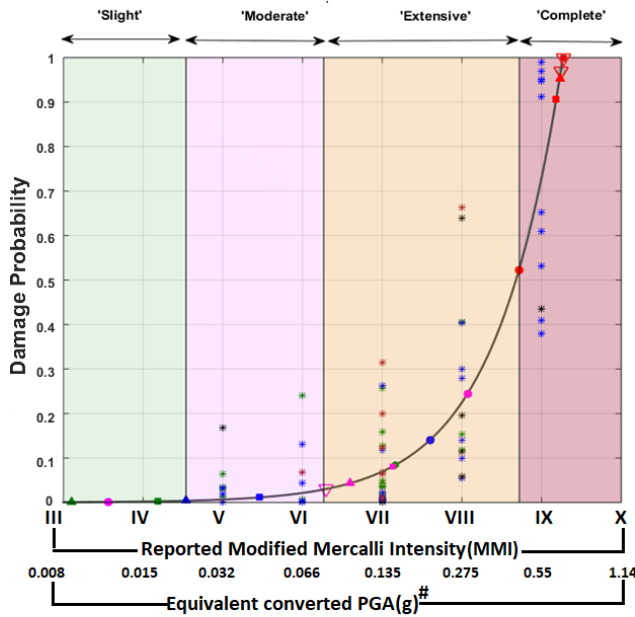

— Damage Probability curve for Unreinforced Masonry (URM)-type buildings based on exponential regression of the following

- \* Reported damage converted to damage probability for 1934 Bihar-Nepal earthquake of Mw 8.1
- \* Reported damage converted to damage probability for 1988 Nepal-Bihar earthquake of Mw 6.5
- \* Reported damage converted to damage probability for 2015 Gorkha-Nepal earthquake of Mw 7.8
- \* Other reported damage converted to damage probability for 1833 Nepal earthquake of Mw 7.6, 1966 Bajhang earthquake of Mw 6.3, 1980 Chainpur earthquake of Mw 6.5 and 2011 Sikkim earthquake of Mw 6.9

**Simulated damage states using SELENA package for**

**1934 Bihar-Nepal earthquake of Mw 8.1 Scenario**

- ▲ Complete
- ▲ Extensive
- ▲ Moderate
- ▲ Slight

**1988 Nepal-Bihar earthquake of Mw 6.5 Scenario**

- Complete
- Extensive
- Moderate
- Slight

**2015 Gorkha-Nepal earthquake of Mw 7.8 Scenario**

- Complete
- Extensive
- Moderate
- Slight

Surface-consistent Probabilistic Seismic Hazard Scenario

- ▽ Complete
- ▽ Extensive

# MMI to PGA conversion (Anbazhagan et al., 2016):  $MMI=0.1417+3.2335\log(PGA)$

(c) SELENA generated hybrid predicted & scenario combined damage state domain demarcation for RC-type buildings in Nepal

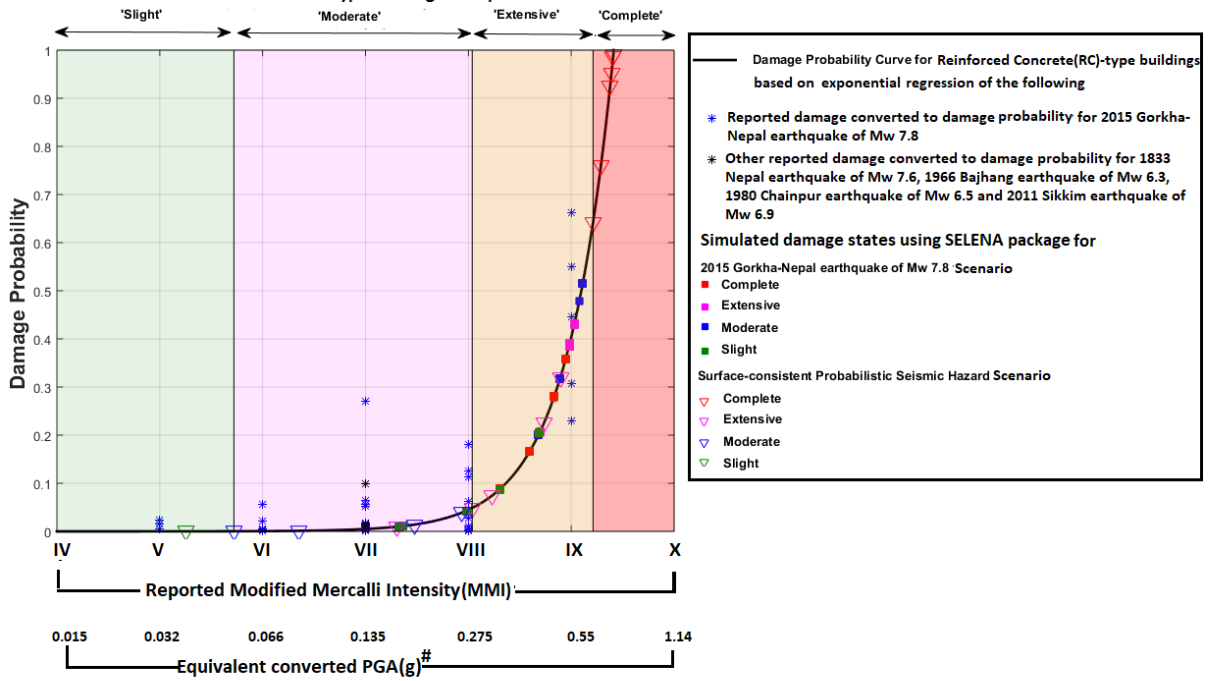

# MMI to PGA conversion (Anbazhagan et al., 2016):  $MMI=0.1417+3.2335\log(PGA)$

**Figure 23.** Damage probability curves for Nepal region for (a) Adobe (A1), (b) Unreinforced Masonry (URM) and (c) Reinforced Concrete (RC)-type buildings based on exponential regression of reported damage converted to damage probability for different earthquake scenarios. SELENA generated hybrid predicted and scenario combined damage states have been demarcated based on simulated damage states for three earthquake scenarios viz. 1934 Bihar-Nepal earthquake of  $M_w$  8.1, 1988 Nepal-Bihar earthquake of  $M_w$  6.9 and 2015 Gorkha-Nepal earthquake of  $M_w$  7.8 and Surface-consistent Probabilistic Seismic Hazard scenario.

(a) SELENA generated hybrid predicted & scenario combined damage state domain demarcation for A1-type buildings in Northeast India region

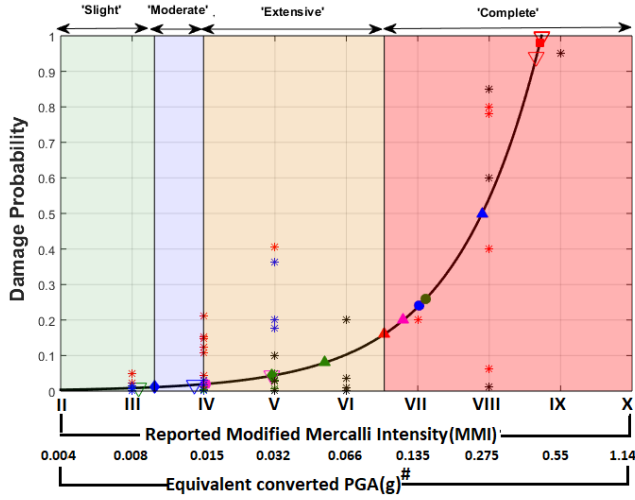

# MMI to PGA conversion (Anbazhagan et al., 2016):  $MMI=0.1417+3.2335\log(PGA)$

— Damage probability curve for Adobe (A1)-type buildings based on exponential regression of the following

- \* Reported damage converted to damage probability for 2011 Sikkim earthquake of Mw 6.9
- \* Reported damage converted to damage probability for 2021 Sonitpur earthquake of Mw 6.4
- \* Reported damage converted to damage probability for 2009 Bhutan earthquake of Mw 6.1
- \* Other reported damage converted to damage probability for 2016 Manipur earthquake of Mw 6.7, 2006 Dewangthang earthquake of Mw 5.8, 2017 Ambasa earthquake of Mw 5.7, 2020 Champai earthquake of Mw 5.5 and 2003 Paro earthquake of Mw 5.5

Simulated damage states using SELENA package for Imphal, Shillong, Itanagar and Thimphu cities for

1988 Indo-Burma earthquake of Mw 7.2 Scenario

- ▲ Complete
- ▲ Extensive
- ▲ Moderate
- ▲ Slight

2011 Sikkim earthquake of Mw 6.9 Scenario

- ◆ Moderate
- ◆ Slight

1943 Assam earthquake of Mw 7.2 Scenario

- Extensive
- Moderate
- Slight

1897 Shillong earthquake of Mw 8.1 Scenario

- Complete
- Extensive

Surface-consistent Probabilistic Seismic Hazard Scenario

- ▽ Complete
- ▽ Extensive
- ▽ Moderate
- ▽ Slight

(b) SELENA generated hybrid predicted & scenario combined damage state domain demarcation for URM-type buildings in Northeast India region

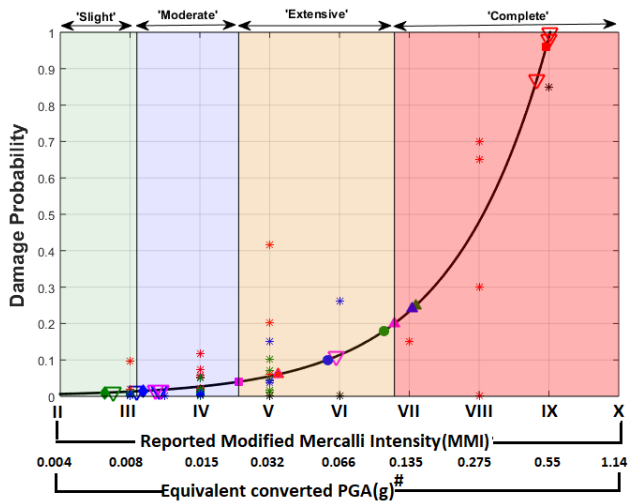

# MMI to PGA conversion (Anbazhagan et al., 2016):  $MMI=0.1417+3.2335\log(PGA)$

— Damage probability curve for Unreinforced Masonry (URM)-type buildings based on exponential regression of the following

- \* Reported damage converted to damage probability for 2011 Sikkim earthquake of Mw 6.9
- \* Reported damage converted to damage probability for 2021 Sonitpur earthquake of Mw 6.4
- \* Reported damage converted to damage probability for 2009 Bhutan earthquake of Mw 6.1
- \* Other reported damage converted to damage probability for 2016 Manipur earthquake of Mw 6.7, 2006 Dewangthang earthquake of Mw 5.8, 2017 Ambasa earthquake of Mw 5.7, 2020 Champai earthquake of Mw 5.5 and 2003 Paro earthquake of Mw 5.5

Simulated damage states using SELENA package for Imphal, Shillong, Itanagar and Thimphu cities for

1988 Indo-Burma earthquake of Mw 7.2 Scenario

- ▲ Complete
- ▲ Extensive
- ▲ Moderate
- ▲ Slight

2011 Sikkim earthquake of Mw 6.9 Scenario

- ◆ Moderate
- ◆ Slight

1943 Assam earthquake of Mw 7.2 Scenario

- Extensive
- Moderate
- Slight

1897 Shillong earthquake of Mw 8.1 Scenario

- Complete
- Extensive

Surface-consistent Probabilistic Seismic Hazard Scenario

- ▽ Complete
- ▽ Extensive
- ▽ Moderate
- ▽ Slight



(c) SELENA generated hybrid predicted & scenario combined damage state domain demarcation for RC-type buildings in Northeast India region

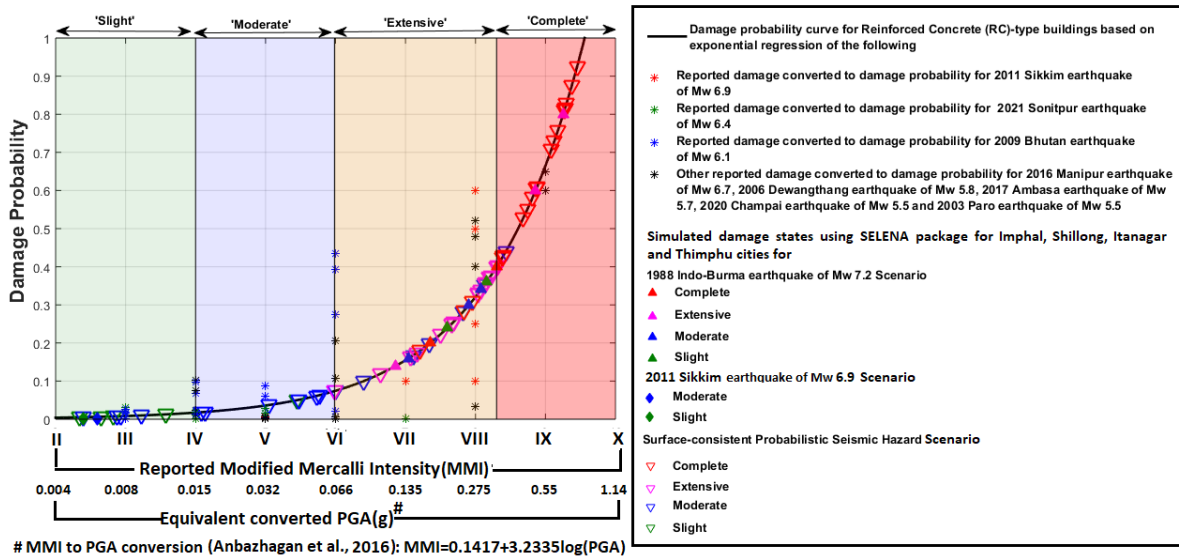

**Figure 24.** Damage probability curve for Northeast India region for (a) Adobe (A1), (b) Unreinforced Masonry (URM) and (c) Reinforced Concrete (RC)-type buildings based on exponential regression of reported damage converted to damage probability for different earthquake scenarios. SELENA generated hybrid predicted and scenario combined damage states have been demarcated based on simulated damage states for Four earthquake scenarios viz. 1897 Shillong earthquake of  $M_w$  8.1, 1943 Assam earthquake of  $M_w$  7.2, 1988 Indo-Burma earthquake of  $M_w$  7.2 and 2011 Sikkim earthquake of  $M_w$  6.9 and Surface-consistent Probabilistic Seismic Hazard scenario.

(a) SELENA generated hybrid predicted & scenario combined damage state domain demarcation for A1-type buildings in Bhutan region

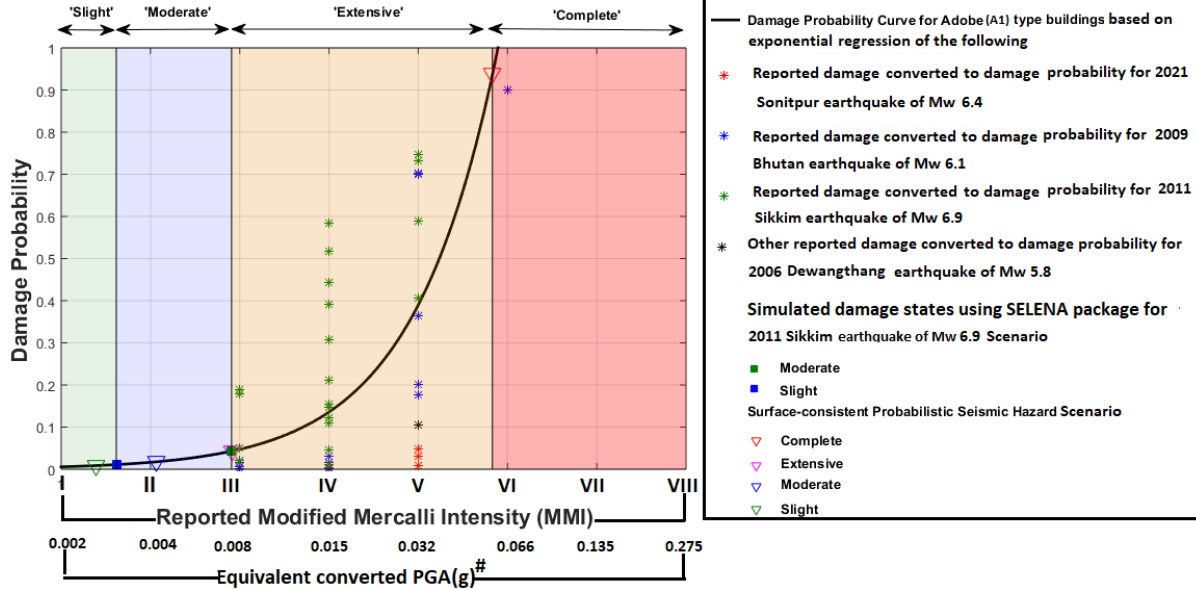

# MMI to PGA conversion (Anbazhagan et al., 2016):  $MMI = 0.1417 + 3.2335 \log(PGA)$

(b) SELENA generated hybrid predicted & scenario combined damage state domain demarcation for URM-type buildings in Bhutan region

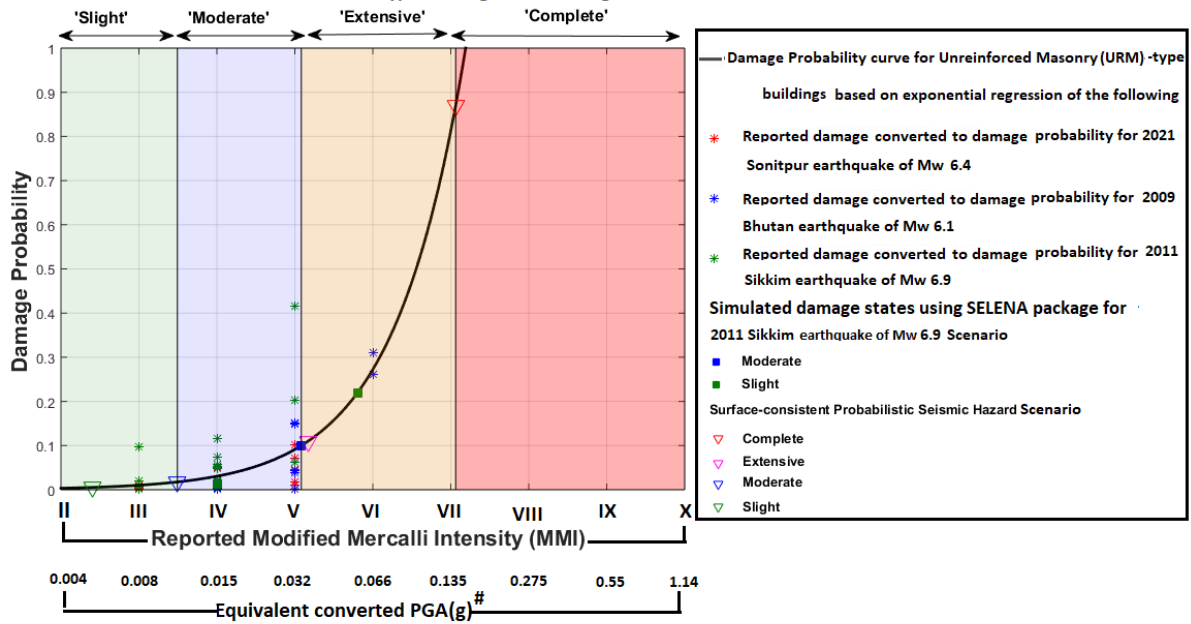

# MMI to PGA conversion (Anbazhagan et al., 2016):  $MMI = 0.1417 + 3.2335 \log(PGA)$

(c) SELENA generated hybrid predicted & scenario combined damage state domain demarcation for RC-type buildings in Bhutan region

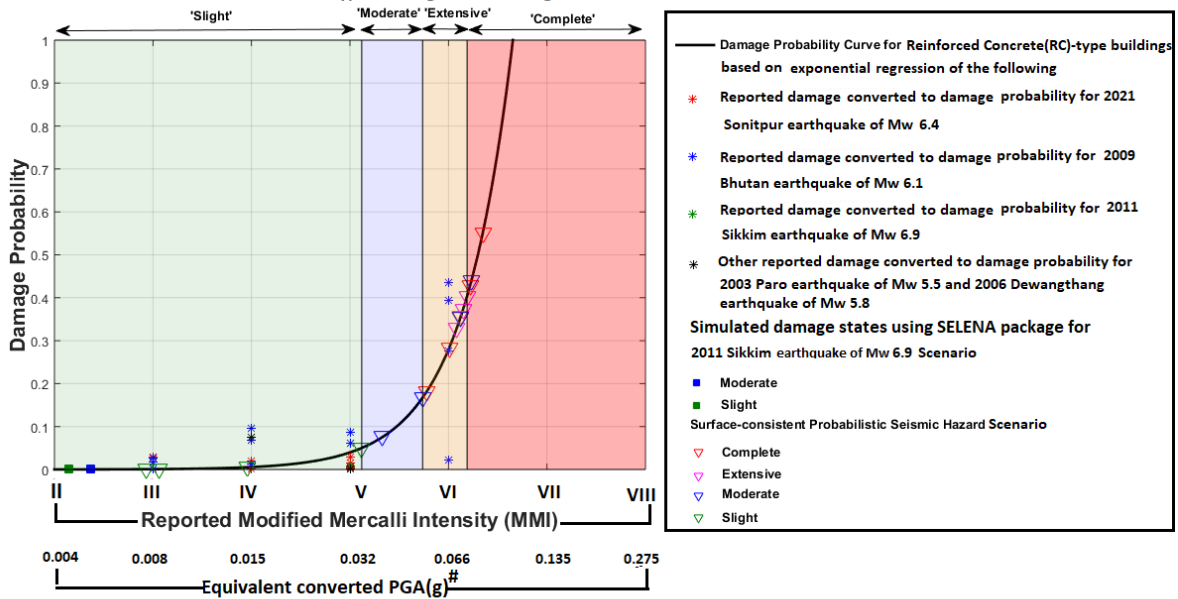

# MMI to PGA conversion (Anbazhagan et al., 2016):  $MMI=0.1417+3.2335\log(PGA)$

**Figure 25.** Damage probability curve for Bhutan region for (a) Adobe (A1), (b) Unreinforced Masonry (URM) and (c) Reinforced Concrete (RC)-type buildings based on exponential regression of reported damage converted to damage probability for different earthquake scenarios. SELENA generated hybrid predicted and scenario combined damage states have been demarcated based on simulated damage states for the 2011 Sikkim earthquake of  $M_w$  6.9 and Surface-consistent Probabilistic Seismic Hazard scenario.

(a) SELENA generated hybrid predicted & scenario combined damage state domain demarcation for A1-type buildings in West-Northwest India region

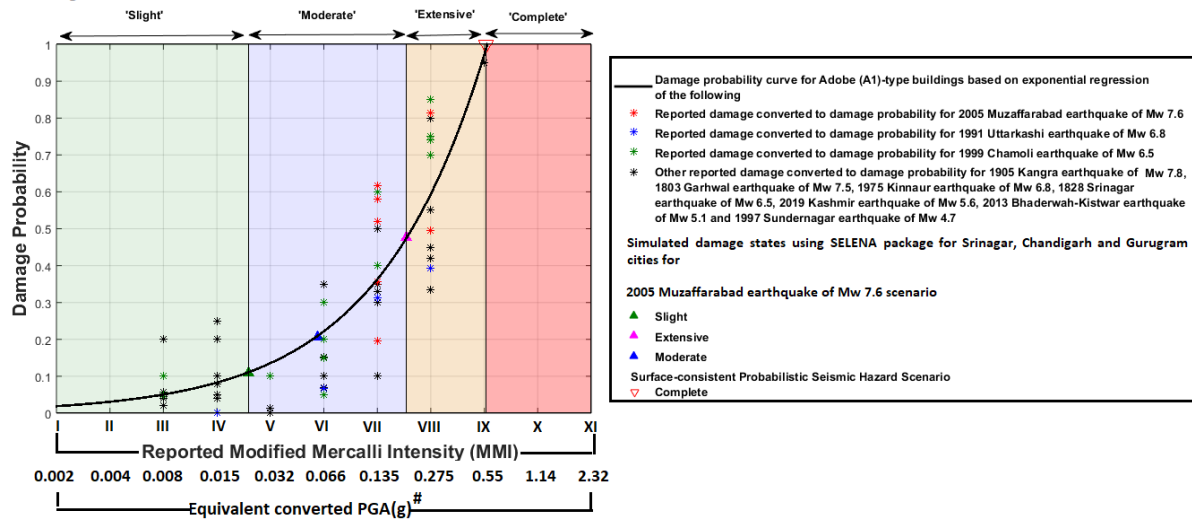

# MMI to PGA conversion (Anbazhagan et al., 2016):  $MMI=0.1417+3.2335\log(PGA)$

(b) SELENA generated hybrid predicted & scenario combined damage state domain demarcation for URM-type buildings in West-Northwest India region

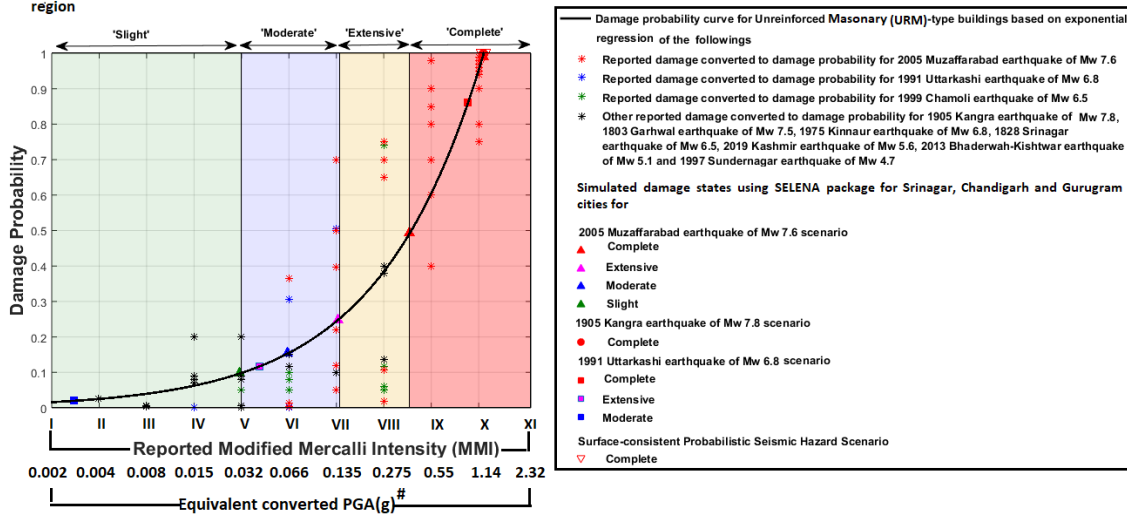

# MMI to PGA conversion (Anbazhagan et al., 2016):  $MMI = 0.1417 + 3.2335 \log(PGA)$

(c) SELENA generated hybrid predicted & scenario combined damage state domain demarcation for RC-type buildings in West-Northwest India region

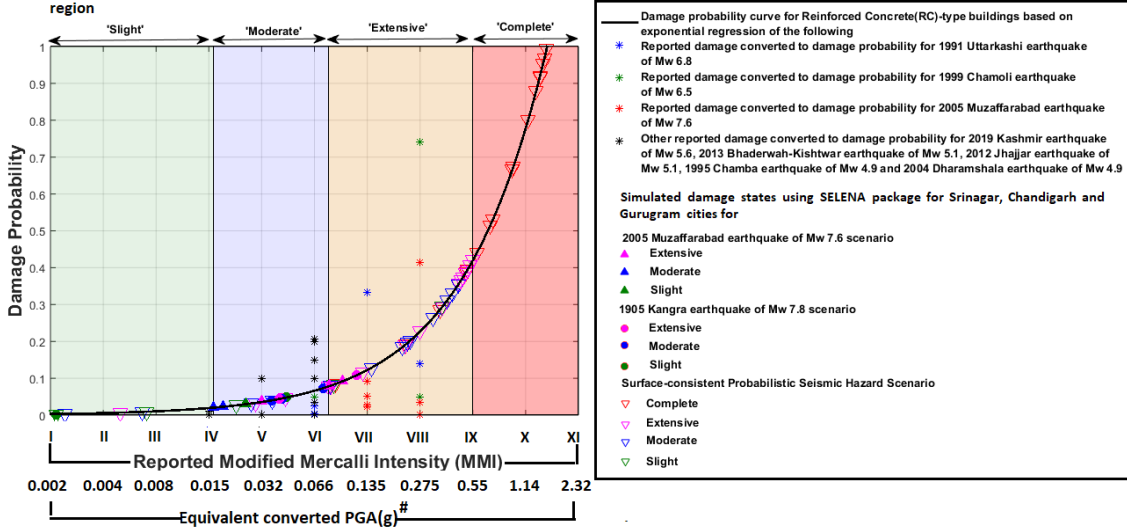

# MMI to PGA conversion (Anbazhagan et al., 2016):  $MMI = 0.1417 + 3.2335 \log(PGA)$

**Figure 26.** Damage probability curve for West-Northwest India region for (a) Adobe (A1), (b) Unreinforced Masonry (URM) and (c) Reinforced Concrete (RC)-type buildings based on exponential regression of reported damage converted to damage probability for different earthquake scenarios. SELENA generated hybrid predicted and scenario combined damage states have been demarcated based on simulated damage states for three earthquake scenarios viz. 1905 Kangra earthquake of  $M_w$  7.8, 1991 Uttarkashi earthquake of  $M_w$  6.8 and 2005 Muzaffarabad earthquake of  $M_w$  7.6 and Surface-consistent Probabilistic Seismic Hazard scenario.

**Reviewer#1:** Why would the authors mention many cities in the manuscript? Does that really make a sense?

**Authors' Response:** The observation has been noted and appropriate modifications will be done in the manuscript while revising it.

**Reviewer#1:** Although the work is interesting, how do the authors justify the novelty of the work?

**Authors' Response:** The Authors feel inspired by the words of appreciation and encouragement made by the Reviewer. The novelty of the work has been described in point-wise form below:

1. The Probabilistic Seismic Hazard formulation for both 10% and 2% probability of exceedance in 50 years amounting to 475 and 2475 years of return periods respectively for the Indian subcontinent have been implemented in a rigorous Logic Tree Framework consisting of the followings:
  - (a) Consideration of 172 polygonal as well as 3216 major tectonic seismogenic sources defined through juxtaposition of active tectonic, seismicity and homogeneous declustered earthquake catalogue, the moment tensor solutions and faults and lineaments extracted through Remote sensing and GIS database.
  - (b) Consideration of multiple threshold magnitudes viz.  $M_w$  3.5, 4.5 and 5.5 as ascertained from the complete and homogeneous declustered earthquake catalogue for 1900-2018 consisting of 64,153 main seismic events.
  - (c) Inclusion of depth wise variation of seismic activity rates for both the polygonal and tectonic seismogenic sources using smoothing seismicity (Frankel, 1995) for the depth ranges of 0-25km, 25-70km, 70-180km and 180-300km.
  - (d) Region-specific depth wise maximum earthquake prognosis from the sub-catalogues extracted from the main homogenous declustered catalogue of Nath et al. (2017).
  - (e) Selection of hordes of Ground Motion Prediction Equations (GMPEs) taken from all the local-specific researches totaling to about 197 of which there had been 68 Next Generation Spectral Attenuation models (NGAs) developed by Nath (2017) and Nath et al. (2021) as a part of the present research whose ranks and weights have been determined using Log Likelihood (LLH) calculations following Scherbaum et al. (2009).
  - (f) Usages of both the aleatory and epistemic uncertainties associated with magnitude, rupture distance and GMPEs/ NGAs for all the depth wise seismogenic sources in all the tectonic territories.
2. The Socio-economic Risk Map of India is generated by integrating vulnerability exposures viz. Population Density, Building Density, Landuse/landcover extracted from Census (2011) and Remote Sensing imagery viz. Sentinel 2, Landsat 8 and LISS-IV with IBC-compliant surface-consistent Probabilistic Seismic Hazard through an Analytic Hierarchy Process and expert judgement for the entire Indian territory.
3. An enriched database containing a huge volume of geophysical, geotechnical, geological, geomorphological and topography data has been used to towards seismic site classification and its characterization of entire ensemble from Kashmir Himalaya to Northeast India. Geology, Geomorphology, Slope and Landform are used for establishing a regional- specific empirical relation through a nonlinearly regressed 5<sup>th</sup> order polynomial equation to estimate the effective shear wave velocity ( $V_s^{30}$ ) for characterizing the region into various Site classes based on NEHRP (BSSC, 2003), FEMA (2000) and Sun et al. (2018) nomenclature. Around 3000 data points have been used for the nonlinear regression analysis, out of which 80% (Training) data are considered for establishing the empirical relationship and remaining 20% (Testing) are used for the validation purposes. From the correlation

between geotechnical and regional dataset, it is observed that most of the data set are lying within the 70% confidence bound and nearly follow 1:1 correspondence line as is also reported by Nath et al (2021).

We have also used the lithology-specific and depth-dependent empirical relations between SPT-N and  $V_s$  for the alluvial plain region in which lithological units have been classified into sixteen categories by Nath et al (2021) according to their grain size, plasticity index and presence or absence of decomposed wood etc. as (i) Top Soil, (ii) Sand, (iii) Sandy Silt (iv) Silty Clay with Decomposed Wood, (v) Silty Clay with Mica, Sand and/or Kankar, (vi) Clay with Decomposed Wood, (vii) Silty Sand with Mica and/or Clay (viii) Silty Clay with rusty Silty Spots, (ix) Sand with Silt and Clay, (x) Silty Sand with Mica and Kankar, (xi) Bluish/Yellowish grey Silt, (xii) Silt, (xiii) Sand and (xiv) Fine Sand with Gravel (xv) Clayey Silt and (xvi) All Soils.

4. Seismic Site Characterization has been carried out for the entire ensemble from Kashmir Himalaya to Northeast India in terms of absolute site amplification factor, spectral site amplification factor, predominant frequency and generic site amplification spectra. Surface-consistent Probabilistic Seismic Hazard assessment is done through convolution of the bedrock level hazard with estimated site amplification factors as has been presented along with design response spectra at both bedrock and surface levels for many important cities indicating an appreciable enhancement in the existing design values.

5. SELINA-based urban structural impact assessment has been carried out for the first time for a few Capital-Spiritual-Commercial Cities such as Srinagar, Chandigarh, Gurugram, Kanpur, Asansol, Chittagong, Thimphu, Shillong, Imphal, Itanagar and Kathmandu for the surface-consistent probabilistic seismic hazard for 10% probability of exceedance in 50 years. Seismic damageability functions have been derived for the three seismogenic tectonic territories viz. West-Northwest Himalaya, North-central Himalaya and Northeast India along with the countries of Nepal and Bhutan for three most prevalent building types seen across the regions i.e. Adobe (A1), Unreinforced Masonry (URM) and Reinforced Concrete (RC)-type buildings. SELINA generated hybrid predicted and scenario combined damage states have been demarcated based on simulated damage states for different earthquake scenarios and surface-consistent Probabilistic Seismic Hazard.

Thus, this work presents a unique benchmark regional-local hybrid seismic hazard-disaster model for pre-disaster preparedness in the form of updated urban by-laws and post-disaster rehabilitation and future disaster management for the ensemble.

**Reviewer#1:** Please construct a methodological flowchart to summarize the work.

**Authors' Response:** We will include the following process flowchart in the revised manuscript as suggested by the Reviewer.

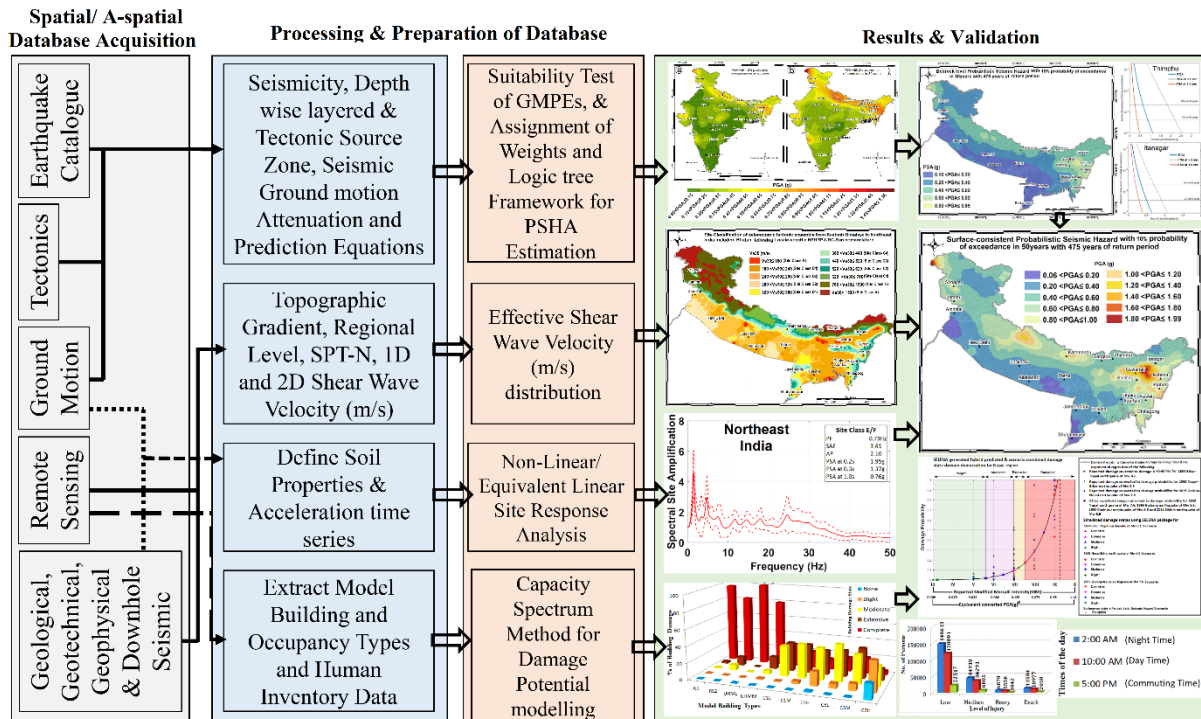

**Figure 4.** Methodological flow chart summarizing the present work.

**Reviewer#1:** Some of the illustrations do not have adequate quality, please consider replotting.

**Authors' Response:** This point is noted and appropriate remedial action will be taken while revising the manuscript.

**Reviewer#1:** Please flesh up your conclusions once you revise the manuscript.

**Authors' Response:** The observation has been noted and the conclusion section will be modified in the revised manuscript.

**New References:**

Agrawal, N., Gupta, L., Dixit, J., and Dash, S. K.: An integrated assessment of seismic hazard exposure and its societal impact in Seven Sister States of North Eastern Region of India for sustainable disaster mitigation planning, <https://doi.org/10.21203/rs.3.rs-1003515/v1>, 2021.

Al-Hussaini, T. M., and Al-Noman, M. N.: Probabilistic estimates of PGA and Spectral Acceleration in Bangladesh. In Proceedings, 3rd international earthquake symposium, Bangladesh, Dhaka, pp. 5-6, 2010.

Anbazhagan, P., Bajaj, K. and Patel, S.: Seismic hazard maps and spectrum for Patna considering region-specific seismotectonic parameters, *Natural Hazards*, 78, 1163–1195, <https://doi.org/10.1007/s11069-015-1764-0>, 2015.

Anbazhagan, P., Bajaj, K., Matharu, K., Moustafa, S. S. R., and Al-Arifi, N. S. N.: Probabilistic seismic hazard analysis using the logic tree approach – Patna district (India), *Nat. Hazards Earth Syst. Sci.*, 19, 2097–2115, <https://doi.org/10.5194/nhess-19-2097-2019>, 2019a.

- Anbazhagan, P., Kumar, A., and Sitharam, T. G.: Seismic Site Classification and Correlation between Standard Penetration Test N Value and Shear Wave Velocity for Lucknow City in Indo-Gangetic Basin, *Pure and Applied Geophysics*, 170, 299–318, <https://doi.org/10.1007/s00024-012-0525-1>, 2013.
- Anbazhagan, P., Srilakshmi, K. N., Bajaj, K., Moustafa, S. S., and Al-Arifi, N. S.: Determination of seismic site classification of seismic recording stations in the Himalayan region using HVSR method, *Soil Dynamics and Earthquake Engineering*, 116, 304-316, <https://doi.org/10.1016/j.soildyn.2018.10.023>, 2019b.
- Arya, A. S.: October 20, 1991 Uttarkashi (India) earthquake. *Earthquake Engineering*, 10th World Conference©1994 Balkema, Rotterdam, pp. 7039-7043, 1994. Bahuguna, A., and Sil, A.: Comprehensive seismicity, seismic sources and seismic hazard assessment of Assam, North East India, *Journal of Earthquake Engineering*, 24(2), 254-297, <https://doi.org/10.1080/13632469.2018.1453405>, 2020.
- Bajaj, K., and Anbazhagan, P.: Comprehensive amplification estimation of the Indo Gangetic Basin deep soil sites in the seismically active area, *Soil Dynamics and Earthquake Engineering*, 127, 105855, <https://doi.org/10.1016/j.soildyn.2019.105855>, 2019.
- Baro, O., Kumar, A., and Ismail-Zadeh, A.: Seismic hazard assessment of the Shillong Plateau using a probabilistic approach, *Geomatics, Natural Hazards and Risk*, 11(1), 2210-2238, <https://doi.org/10.1080/19475705.2020.1833989>, 2020.
- Bhatia, S. C., Kumar, M. R and Gupta, H. K.: A probabilistic seismic hazard map of India and adjoining regions, 42, 6, 1999.
- Bhargava, O. N., Ameta, S. S., Gaur, R. K., Kumar, S., Agrawal, A. N., Jalote, P. M., and Sadhu, M. L.: The Kinnaur (HP India) earthquake of 19 January 1975: summary of geoseismological observations. *Bulletin of the Indian Geological Association*, 11(1), 39-53, 1978.
- Bilham, R.: Location and magnitude of the 1833 Nepal earthquake and its relation to the rupture zones of contiguous great Himalayan earthquakes. *Current Science*, 69(2), 101-128, 1995.
- Bilham, R., Gaur, V. K., and Molnar, P.: Himalayan seismic hazard, *Science*, 293(5534), 1442-1444, <https://doi.org/10.1126/science.1062584>, 2001.
- BIS: IS 1893–2002 (Part 1): Indian Standard Criteria for Earthquake Resistant Design of Structures, Part 1 – General Provisions and Buildings, Bureau of Indian Standards, New Delhi, 20, 2002.
- Biswas, R., Baruah, S., and Bora, N.: Assessing shear wave velocity profiles using multiple passive techniques of Shillong region of northeast India, *Natural Hazards*, 94(3), 1023-1041, <https://doi.org/10.1007/s11069-018-3453-2>, 2018.
- BMTPC: Vulnerability Atlas of India: Earthquake, Wind, Flood, Landslide, Thunderstorm Maps and Damaged Risk to Housing, Building Materials and Technology Promotion council, Ministry of Housing & Urban Affairs, Government of India, third edition, <https://vai.bmtpc.org/>, 2019.
- BNBC: Bangladesh National Building Code, Bangladesh House Building Research Institute, 2017.
- BSSC: NEHRP recommended provisions for seismic regulations for new buildings and other structures. 2003 Edition, Part 1: Provisions, Building Seismic Safety Council for the Federal Emergency Management Agency (Report FEMA 450), and Washington D.C., <https://www.nehrp.gov/>, 2003.
- Census: Census of India 2011. Provisional Population Totals. New Delhi: Government of India, 409-413, 2011.
- Chaulagain, H., Rodrigues, H., Silva, V. et al. Seismic risk assessment and hazard mapping in Nepal. *Nat Hazards* 78, 583–602. <https://doi.org/10.1007/s11069-015-1734-6>, 2015.



- Chaulagain, H., Gautam, D., and Rodrigues, H.: Revisiting major historical earthquakes in Nepal: Overview of 1833, 1934, 1980, 1988, 2011, and 2015 seismic events. Impacts and insights of the Gorkha earthquake, 1-17. <https://doi.org/10.1016/B978-0-12-812808-4.00001-8>, 2018.
- Chen, H., Xie, Q., Li, Z., Xue, W., and Liu, K.: Seismic damage to structures in the 2015 Nepal earthquake sequences, *Journal of Earthquake Engineering*, 21(4), 551-578, <https://doi.org/10.1080/13632469.2016.1185055>, 2017.
- Chettri, N., Gautam, D., and Rupakhety, R.: Seismic Vulnerability of Vernacular Residential Buildings in Bhutan, *Journal of Earthquake Engineering*, 1-16, <https://doi.org/10.1080/13632469.2020.1868362>, 2021.
- Das, R., Sharma, M. L. and Wason, H. R.: Probabilistic Seismic Hazard Assessment for Northeast India Region, *Pure and Applied Geophysics*, 173, 2653–2670, <https://doi.org/10.1007/s00024-016-1333-9>, 2016.
- Dasgupta, S., and Mukhopadhyay, B.: Historiography and commentary from archives on the Kathmandu (Nepal)–India earthquake of 26 August 1833. *Indian Journal of History of Science (INSA)*, 50, 491-513, <https://doi.org/10.13140/RG.2.1.4088.2726>, 2015.
- Debbarma, J., and Debnath, J.: Assessment on the impact of the Tripura earthquake (January 3, 2017,  $M_w = 5.6$ ) in Northeast India. *Journal of the Geographical Institute “Jovan Cvijić” SASA*, 71(1), 1-13, <https://doi.org/10.2298/IJGI2101001D>, 2021.
- Dey, C., Santanu, B., Mohamed, F. A., Saikia, S., Molia, N., Borthakur, P., Chetia et al.: The 28 April 2021 Kopili Fault Earthquake ( $M_w$  6.1) in Assam Valley of North East India: Seismotectonic Appraisal. *Pure and Applied Geophysics*, 1-16, 2022. FEMA: Prestandard and commentary for the Seismic Rehabilitation of Buildings, Federal Emergency Management Agency 356, Washington D.C., 2000.
- Frankel, A.: Mapping seismic hazard in the central and eastern United States. *Seismological Research Letters*, 66(4), 8-21, 1995.
- Fujiwara, T., Sato, T., Murakami, H.O., Kubo, T.: Reconnaissance Report on the 21 August 1988 Earthquake in the Nepal-India Border Region, Research Report on Natural Disasters. Japanese Group for the Study of Natural Disaster Science, Tokyo, Japan, 1989. Gautam, D., and Chaulagain, D.: Preliminary assessment of seismic site effects in the fluvio-lacustrine sediments of Kathmandu valley, Nepal, *Natural Hazards*, 81(3), 1745-1769, <https://doi.org/10.1007/s11069-016-2154-y>, 2016.
- Gautam, D, Rupakhety, R., Adhikari, R., Shrestha, B. C., Baruwal, R. and Bhatt, L.: "Seismic vulnerability of Himalayan stone masonry: Regional perspectives." In *Masonry Construction in Active Seismic Regions*, pp. 25-60. Woodhead Publishing, 2021.
- Gautam, D., Chettri, N., Tempa, K., Rodrigues, H., and Rupakhety, R.: Seismic vulnerability of bhutanese vernacular stone masonry buildings: From damage observation to fragility analysis. *Soil Dynamics and Earthquake Engineering*, 160, 107351, <https://doi.org/10.1016/j.soildyn.2022.107351>, 2022.
- Ghione, F., Poggi, V., and Lindholm, C.: A hybrid probabilistic seismic hazard model for Northeast India and Bhutan combining distributed seismicity and finite faults, *Physics and Chemistry of the Earth, Parts A/B/C*, 123, 103029, <https://doi.org/10.1016/j.pce.2021.103029>, 2021.
- GSI: A report on intensity surveys carried out for Uttarkashi earthquake of October 20, 1991, Geological Survey of India, special publication no. 30, 1992.

- Gupta, S. P.: Report on Eastern Nepal Earthquake of 21 August 1~ 88, Damages and Recommendations for Repairs and Reconstruction, Asian Disaster Preparedness Center, Asian Institute of Technology, Bangkok, Thailand, 1988.
- Gupta, A. K., Chopra, S., Prajapati, S. K., Sutar, A. K., & Bansal, B. K.: Intensity distribution of M 4.9 Haryana–Delhi border earthquake. *Natural hazards*, 68(2), 405-417, 2013.
- Gupta, A., Gupta, I. D., and Gupta, V. K.: Probabilistic seismic hazard mapping of National Capital Region of India using a modified gridded seismicity model, *Soil Dynamics and Earthquake Engineering*, 144, 106632, <https://doi.org/10.1016/j.soildyn.2021.106632>, 2021a.
- Gupta, L., Agrawal, N., and Dixit, J.: Spatial distribution of bedrock level peak ground acceleration in the National Capital Region of India using geographic information system, *Geomatics, Natural Hazards and Risk*, 12(1), 3287-3316, <https://doi.org/10.1080/19475705.2021.2008022>, 2021b.
- Halder, L., Dutta, S. C., and Sharma, R. P.: Damage study and seismic vulnerability assessment of existing masonry buildings in Northeast India, *Journal of Building Engineering*, 29, 101190, 2020.
- Haque, D. M. E., Khan, N. W., Selim, M., Kamal, A. S. M., and Chowdhury, S. H.: Towards improved probabilistic seismic hazard assessment for Bangladesh, *Pure and Applied Geophysics*, 177(7), 3089-3118, <https://doi.org/10.1007/s00024-019-02393-z>, 2020.
- Huded, P. M., and Dash, S. R.: Probabilistic Seismic Hazard Assessment at Bedrock Level Using a Logic Tree Approach: A Case Study for Odisha, an Eastern State of India, *Pure and Applied Geophysics*, 179, 527–549, <https://doi.org/10.1007/s00024-021-02929-2>, 2022.
- Iyengar, R. N., and Ghosh, S.: Seismic hazard mapping of Delhi city, In *Proceedings of 13<sup>th</sup> world conference on earthquake engineering*, Vancouver, BC, Canada, pp. 180, 2004.
- Jaisal, A. K., Gupta, I. D., and Gupta, V. K.: Probabilistic seismic hazard mapping of northwest India using area sources with non-uniform spatial distribution of seismicity, *ISET Journal of Earthquake Technology*, Paper No. 556, Vol. 57, No. 3, pp. 103-150, 2020.
- Kandpal, G. C., John, B., and Joshi, K. C.: Geotechnical studies in relation to seismic microzonation of union territory of Chandigarh, *Journal of Indian Geophysical Union*, 13(2), 75-83, 2009.
- Kumar, R. P., and Murty, C. V. R.: Earthquake safety of houses in India: understanding the bottlenecks in implementation. *Indian Concrete Journal*, 1, 2014.
- Kumar, P., Joshi, A., Kumar, S., and Lal, S.: Determination of site effect and anelastic attenuation at Kathmandu, Nepal Himalaya region and its use in estimation of source parameters of 25 April 2015 Nepal earthquake  $M_w=7.8$  and its aftershocks including the 12 May 2015  $M_w=7.3$  event, *Natural Hazards*, 91(3), 1003-1023, <https://doi.org/10.1007/s11069-018-3178-2>, 2018.
- Mahajan, A. K.: The 24<sup>th</sup> March, 1995 Chamba earthquake (NW Himalaya), field observations and seismotectonics, *Journal of the Geological Society of India*, 51(2), 227-232, 1998.
- Mahajan, A. K., Kumar, N., and Arora, B. R.: Quick look isoseismal map of 8 October 2005 Kashmir earthquake, *Current Science*, 356-361, 2006.
- Mahajan, A. K., Mundepi, A. K., Chauhan, N., Jasrotia, A. S., Rai, N., and Gachhayat, T. K.: Active seismic and passive microtremor HVSR for assessing site effects in Jammu city, NW Himalaya, India—A case study, *Journal of Applied Geophysics*, 77, 51-62, <https://doi.org/10.1016/j.jappgeo.2011.11.005>, 2012.

- Maiti, S. K., Nath, S. K., Adhikari, M. D., Srivastava, N., Sengupta, P., and Gupta, A. K.: Probabilistic seismic hazard model of West Bengal, India, *Journal of Earthquake Engineering*, 21(7), 1113-1157, <https://doi.org/10.1080/13632469.2016.1210054>, 2017.
- Mir, R. R., and Parvez, I. A.: Ground motion modelling in northwestern Himalaya using stochastic finite-fault method, *Natural Hazards*, 103, 1989–2007, <https://doi.org/10.1007/s11069-020-04068-8>, 2020.
- Molina, S., Lang, D. H., and Lindholm, C. D.: SELENA v6.0: User and Technical Manual v6.0, Report no. 14-003, Kjeller (Norway) – Alicante (Spain), 102, 2014.
- Mukhopadhyay, B., and Dasgupta, S.: Seismic hazard assessment of Kashmir and Kangra valley region, Western Himalaya, India. *Geomatics, Natural Hazards and Risk*, 6(2), 149-183, <https://doi.org/10.1080/19475705.2013.832405>, 2015.
- Nath, S. K., and Thingbaijam, K. K. S.: Probabilistic seismic hazard assessment of India. *Seismological Research Letters*, 83(1), 135-149, 2012.
- Nath, S. K., Adhikari, M. D., Maiti, S. K., Devaraj, N., Srivastava, N., and Mohapatra, L. D.: Earthquake scenario in West Bengal with emphasis on seismic hazard microzonation of the city of Kolkata, India, *Natural Hazards and Earth System Sciences*, 14, 2549–2575, <https://doi.org/10.5194/nhess-14-2549-2014>, 2014.
- Nath, S. K.: Probabilistic Seismic Hazard Atlas of 40 Cities in India published by Geoscience Division, Ministry of Earth Sciences (MoES), Govt. of India, New Delhi, © MoES, Govt. of India, 457p, 2017.
- Nath, S. K., Mandal, S., Adhikari, M. D., and Maiti, S. K.: A Unified Earthquake Catalogue for South Asia covering the period 1900-2014, *Natural Hazards*, 85(3), 1787-1810, <https://doi.org/10.1007/s11069-016-2665-6>, 2017.
- Nath, S. K., Adhikari, M. D., Maiti, S. K., and Ghatak, C.: Earthquake hazard potential of Indo-Gangetic Foredeep: its seismotectonism, hazard, and damage modeling for the cities of Patna, Lucknow, and Varanasi, *Journal of Seismology*, 23(4), 725-769, <https://doi.org/10.1007/s10950-019-09832-3>, 2019.
- Nath, S. K., Ghatak, C., Sengupta, A., Biswas, A., Madan, J., and Srivastava, A.: Regional–Local Hybrid Seismic Hazard and Disaster Modeling of the Five Tectonic Province Ensemble Consisting of Westcentral Himalaya to Northeast India. In: Sitharam T., Jakka R., Kolathayar S. (eds) Latest Developments in Geotechnical Earthquake Engineering and Soil Dynamics. Springer Transactions in Civil and Environmental Engineering. Springer, Singapore, 14, 307-358. [https://doi.org/10.1007/978-981-16-1468-2\\_14](https://doi.org/10.1007/978-981-16-1468-2_14), 2021.
- Pallav, K., Raghukanth, S. T. G., and Singh, K. D.: Probabilistic seismic hazard estimation of Manipur, India, *Journal of geophysics and engineering*, 9(5), 516-533, <https://doi.org/10.1088/1742-2132/9/5/516>, 2012.
- Pallav, K., Raghukanth, S. T. G., and Singh, K. D.: Estimation of seismic site coefficient and seismic microzonation of Imphal City, India, using the probabilistic approach. *Acta Geophysica*, 63(5), 1339-1367, 2015.
- Pandey, M. R., and Molnar, P.: The distribution of intensity of the Bihar-Nepal earthquake of 15 January 1934 and bounds on the extent of the rupture zone. *Journal of Nepal Geological Society*, 5(1), 22-44, 1988.
- Pandey, R. J.: Natural Disasters and Risk Assessment in Uttarakhand with special reference to Uttarkashi Earthquake. *IOSR Journal of Humanities and Social Science (IOSR-JHSS)*, 9(3), 37-42, 2013.

- Pandey, B., Jakka, R. S., Kumar, A., and Mittal, H.: Site characterization of strong-motion recording stations of Delhi using joint inversion of phase velocity dispersion and H/V curve, *Bulletin of the Seismological Society of America*, 106(3), 1254-1266, <https://doi.org/10.1785/0120150135>, 2016.
- Paul, D. K.: A report on Chamoli earthquake of March 29, 1999, Department of Earthquake Engineering, University of Roorkee, 2000.
- Puri, N., and Jain, A.: Possible seismic hazards in Chandigarh city of north-western India due to its proximity to Himalayan frontal thrust, *Journal of Indian Geophysical Union*, 22(5), 485-506, 2018.
- Puri, N., and Jain, A.: Development of Surface Level Seismic Hazard Maps Considering Local Soil Conditions for the State of Haryana, India, *Journal of the Geological Society of India*, 97(11), 1365-1378. <https://doi.org/10.1007/s12594-021-1875-z>, 2021.
- Raghucharan, M. C., and Somala, S. N.: Seismic risk for vernacular building classes in the fertile Indus Ganga alluvial plains at the foothills of the Himalayas, India, In *Risk, Reliability and Sustainable Remediation in the Field of Civil and Environmental Engineering*, pp. 53-72, <https://doi.org/10.1016/B978-0-323-85698-0.00025-3>, 2022.
- Rahman, M. M., Bai, L., Khan, N. G., and Li, G.: Probabilistic seismic hazard assessment for Himalayan-tibetan region from historical and instrumental earthquake catalogs, *Pure and Applied Geophysics*, 175(2), 685-705, <https://doi.org/10.1007/s00024-017-1659-y>, 2018a.
- Rahman, M. Z., Kamal, A. M., and Siddiqua, S.: Near-surface shear wave velocity estimation and Vs30 mapping for Dhaka City, Bangladesh, *Natural Hazards*, 92(3), 1687-1715. <https://doi.org/10.1007/s11069-018-3266-3>, 2018b.
- Rahman, M. Z., Siddiqua, S., and Kamal, A. M.: Shear wave velocity estimation of the near-surface materials of Chittagong City, Bangladesh for seismic site characterization, *Journal of Applied Geophysics*, 134, 210-225, <https://doi.org/10.1016/j.jappgeo.2016.09.006>, 2016.
- Rahman, M., Siddiqua, S., and Kamal, A. S. M.: Seismic source modeling and probabilistic seismic hazard analysis for Bangladesh, *Natural Hazards*, 103(2), 2489-2532, <https://doi.org/10.1007/s11069-020-04094-6>, 2020.
- Ram, T. D., and Wang, G.: Probabilistic seismic hazard analysis in Nepal, *Earthquake Engineering and Engineering Vibration*, 12(4), 577-586, <https://doi.org/10.1007/s11803-013-0191-z>, 2013.
- Ramkrishnan, R., Kolathayar, S., and Sitharam, T. G.: Probabilistic seismic hazard analysis of North and Central Himalayas using regional ground motion prediction equations, *Bulletin of Engineering Geology and the Environment*, 80(10), 8137-8157, <https://doi.org/10.1007/s10064-021-02434-9>, 2021.
- Rao, A., Dutta, D., Kalita, P., Ackerley, N., Silva, V., Raghunandan, M., Ghosh, J., Ghosh, S., Brzev, S., and Dasgupta, K.: Probabilistic seismic risk assessment of India, *Earthquake Spectra*, 36(1\_suppl), 345-371, <https://doi.org/10.1177/8755293020957374>, 2020.
- Rao, K. S., and Ramhmachhuani, R.: Site specific seismic input for structures on hill slopes, *Procedia engineering*, 173, 1747-1754, <https://doi.org/10.1016/j.proeng.2016.12.212>, 2017.
- Sana, H.: A probabilistic approach to the seismic hazard in Kashmir basin, NW Himalaya, *Geoscience Letters*, 6, 5, <https://doi.org/10.1186/s40562-019-0136-0>, 2019.
- Sana, H.: Seismic microzonation of Srinagar city, Jammu and Kashmir, *Soil Dynamics and Earthquake Engineering*, 115, 578-588, <https://doi.org/10.1016/j.soildyn.2018.09.028>, 2018.

- Sarkar, S., and Shanker, D.: Estimation of seismic hazard using PSHA in and around National Capital Region (NCR) of India, *Geosciences*, 7(4), <https://doi.org/109-116.10.5923/j.geo>, 2017.
- Satyam, D. N., and Rao, K. S.: Multi-channel analysis of surface wave (MASW) testing for dynamic site characterization of Delhi region, In *Fifth International Recent Advances in Geotechnical Earthquake Engineering and Soil Dynamics and Symposium in Honor of Professor IM Idriss*, 2010.
- Scaria, A., Gupta, I. D., and Gupta, V. K.: An improved probabilistic seismic hazard mapping of peninsular shield region of India, *Soil Dynamics and Earthquake Engineering*, 141, 106417, <https://doi.org/10.1016/j.soildyn.2020.106417>, 2021.
- Scherbaum, F., Delavaud, E., and Riggelsen, C.: Model selection in seismic hazard analysis: An information-theoretic perspective, *Bulletin of the Seismological Society of America*, 99(6), 3234-3247, <https://doi.org/10.1785/0120080347>, 2009.
- Sil, A., and Sitharam, T. G.: Detection of local site conditions in Tripura and Mizoram using the Topographic Gradient Extracted from Remote Sensing Data and GIS Techniques, *Natural Hazards Review*, 18(2), 04016009, [https://doi.org/10.1061/\(ASCE\)NH.1527-6996.0000228](https://doi.org/10.1061/(ASCE)NH.1527-6996.0000228), 2017.
- Sil, A., Sitharam, T.G. and Kolathayar, S.: Probabilistic seismic hazard analysis of Tripura and Mizoram states, *Natural Hazards*, 68, 1089–1108, <https://doi.org/10.1007/s11069-013-0678-y>, 2013.
- Singh, S., Jain, A. K., Sinha, P., Singh, V. N., and Srivastava, L. S.: The Kinnaur earthquake of January 19, 1975: A field report, *Bulletin of the Seismological Society of America*, 66(3), 887-901, 1976.
- Singh, V.: Earthquake of July 1980 in far western Nepal, *Journal of Nepal Geological Society*, 2(2), 1-11, <https://doi.org/10.3126/jngs.v2i2.32530>, 1982.
- Singh, M., Duggal, S. K., and Singh, V. P.: A Study to Establish Regression Correlation Between Shear Wave Velocity and “N”-Value for Varanasi City, India, *Proceedings of the National Academy of Sciences, India Section A: Physical Sciences*, 91(2), 405-417, 2021.
- Sitharam, T. G., Kolathayar, S., and James, N.: Probabilistic assessment of surface level seismic hazard in India using topographic gradient as a proxy for site condition, *Geoscience Frontiers*, 6(6), 847-859, <https://doi.org/10.1016/j.gsf.2014.06.002>, 2015.
- Sitharam, T. G., Kumar, A., and Anbazhagan, P.: Comprehensive seismic microzonation of Lucknow city with detailed geotechnical and deep site response studies, *Proceedings of Indian geotechnical conference*, 2013.
- Stevens, V. L., Shrestha, S. N., and Maharjan, D. K.: Probabilistic seismic hazard assessment of Nepal, *Bulletin of the Seismological Society of America*, 108(6), 3488-3510, <https://doi.org/10.1785/0120180022>, 2018.
- Sun, C. G., Kim, H. S., Cho, H. I.: Geo-Proxy-Based Site Classification for Regional Zonation of Seismic Site Effects in South Korea, *Applied Sciences*, 8(2), 314, <https://doi.org/10.3390/app8020314>, 2018.
- Thakur, V. C., Mahajan, A. K., Mundepi, A. K., SriRam, V., Pandey, H.C., and Singh, R.: The Sundernagar earthquake (NW Himalaya) of 29<sup>th</sup> July, 1997 field observations and seismotectonics, *Wadia Institute of Himalayan Geology, Dehradun*, 1997.
- Trianni, S. C. T., Lai, C. G., and Pasqualini, E.: Probabilistic seismic hazard analysis at a strategic site in the Bay of Bengal. *Natural Hazards*, 74(3), 1683-1705, <https://doi.org/10.1007/s11069-014-1268-3>, 2014.
- WHE-PAGER: WHE-PAGER Phase 2, Development of Analytical Seismic Vulnerability Functions. EERI-WHE-US Geological Survey, 2008.

- Wyss, M.: Human losses expected in Himalayan earthquakes. *Natural Hazards*, 34(3), 305-314, <https://doi.org/10.1007/s11069-004-2073-1>, 2005.
- Zahoor, F., Rao, K.S., Malla, S.A., Tariq, B., and Bhat, W.A.: Seismic Site Characterization using MASW of Sites along Srinagar Metro Rail Alignment, Jammu and Kashmir, In: Patel, S., Solanki, C.H., Reddy, K.R., Shukla, S.K. (eds) *Proceedings of the Indian Geotechnical Conference 2019. Lecture Notes in Civil Engineering*, vol 138. Springer, Singapore, [https://doi.org/10.1007/978-981-33-6564-3\\_49](https://doi.org/10.1007/978-981-33-6564-3_49), 2021.
